1 **The cryptic plastid of *Euglena longa* defines a new type of non-photosynthetic plastid organelles**

2

3 Zoltán Füssy<sup>1,2,3</sup>, Kristína Záhonová<sup>1,2,4</sup>, Aleš Tomčala<sup>1,\*</sup>, Juraj Krajčovič<sup>5</sup>, Vyacheslav Yurchenko<sup>4</sup>,  
4 Miroslav Oborník<sup>1,3</sup>, Marek Eliáš<sup>4,#</sup>

5

6 <sup>1</sup> Institute of Parasitology, Biology Centre ASCR, České Budějovice, Czech Republic

7 <sup>2</sup> Faculty of Science, Charles University, BIOCEV, Vestec, Czech Republic

8 <sup>3</sup> University of South Bohemia, Faculty of Science, České Budějovice, Czech Republic

9 <sup>4</sup> Life Science Research Centre, Department of Biology and Ecology and Institute of Environmental  
10 Technologies, Faculty of Science, University of Ostrava, Ostrava, Czech Republic

11 <sup>5</sup> Department of Biology, Faculty of Natural Sciences, University of ss. Cyril and Methodius in Trnava,  
12 Trnava, Slovakia

13

14 Running Head: Metabolic roles of the *Euglena longa* cryptic plastid

15

16 #Address correspondence to Marek Eliáš, [marek.elias@osu.cz](mailto:marek.elias@osu.cz).

17 \*Present address: University of South Bohemia, Faculty of Fisheries and Protection of Waters,  
18 CENAKVA, České Budějovice, Czech Republic

19 Zoltán Füssy and Kristína Záhonová contributed equally to this work. Author order was determined on the  
20 basis of seniority.

21

22 Word count:

23 Abstract: 395

24 Text: 6,277

25

## 26 **Abstract**

27 Most secondarily non-photosynthetic eukaryotes have retained residual plastids whose physiological role  
28 is often still unknown. One such example is *Euglena longa*, a close non-photosynthetic relative of *Euglena*  
29 *gracilis* harbouring a plastid organelle of enigmatic function. By mining transcriptome data from *E. longa*  
30 we finally provide an overview of metabolic processes localized to its elusive plastid. The organelle plays  
31 no role in biosynthesis of isoprenoid precursors and fatty acids, and has a very limited repertoire of  
32 pathways concerning nitrogen-containing metabolites. In contrast, the synthesis of phospholipids and  
33 glycolipids has been preserved, curiously with the last step of sulfoquinovosyldiacylglycerol synthesis  
34 being catalysed by the SqdX form of the enzyme so far known only from bacteria. Notably, we show that  
35 the *E. longa* plastid synthesizes tocopherols and a phylloquinone derivative, the first such report for non-  
36 photosynthetic plastids studied so far. The most striking attribute of the organelle is the presence of a  
37 linearized Calvin-Benson (CB) pathway including RuBisCO yet lacking the gluconeogenic part of the  
38 standard cycle, together with ferredoxin-NADP<sup>+</sup> reductase (FNR) and the ferredoxin/thioredoxin systems.  
39 We hypothesize that FNR passes electrons to the ferredoxin/thioredoxin systems from NADPH to activate  
40 the linear CB pathway in response to the redox status of the *E. longa* cell. In effect, the pathway may  
41 function as a redox valve bypassing the glycolytic oxidation of glyceraldehyde-3-phosphate to 3-  
42 phosphoglycerate. Altogether, the *E. longa* plastid defines a new class of relic plastids that is drastically  
43 different from the best studied organelle of this category, the apicoplast.

## 44 45 **Importance**

46 Colourless plastids incapable of photosynthesis evolved in many plant and algal groups, but what  
47 functions they perform is still unknown in many cases. Here we study the elusive plastid of *Euglena*  
48 *longa*, a non-photosynthetic cousin of the familiar green flagellate *Euglena gracilis*. We document an  
49 unprecedented combination of metabolic functions that the *E. longa* plastid exhibits in comparison with  
50 previously characterized non-photosynthetic plastids. For example, and truly surprisingly, it has retained  
51 the synthesis of tocopherols (vitamin E) and a phylloquinone (vitamin K) derivative. In addition, we offer  
52 a possible solution of the long-standing conundrum of the presence of the CO<sub>2</sub>-fixing enzyme RuBisCO in  
53 *E. longa*. Our work provides a detailed account on a unique variant of relic plastids, the first among non-  
54 photosynthetic plastids that evolved by secondary endosymbiosis from a green algal ancestor, and  
55 suggests that it has persisted for reasons not previously considered in relation to non-photosynthetic  
56 plastids.

57  
58 **Key words:** Calvin-Benson cycle, *Euglena longa*, Euglenophyceae, evolution, non-photosynthetic  
59 plastids, phylloquinone, redox balance, sulfoquinovosyldiacylglycerol, tocopherol

60

## 61 INTRODUCTION

62 Photosynthesis was supposedly the primary evolutionary advantage driving the acquisition of the primary  
63 plastid as well as its further spread in eukaryotes by secondary and higher-order endosymbioses (1-3).  
64 However, plastids host many other metabolic pathways, such as biosynthesis of amino and fatty acids,  
65 isopentenyl pyrophosphate (IPP) and its derivatives (isoprenoids), and tetrapyrroles (4-6). Hence,  
66 reversion of photosynthetic lineages to heterotrophy typically does not entail plastid loss and non-  
67 photosynthetic plastids are found in many taxa (7-10).

68 The most extensively studied relic plastid is the apicoplast of apicomplexan parasites  
69 (*Plasmodium falciparum* and *Toxoplasma gondii*, above all). The essentiality of the apicoplast for parasite  
70 survival has attracted much attention as a promising target for parasite-specific inhibitors (11, 12). So far,  
71 three plastid pathways seem to condition the apicoplast retention: non-mevalonate IPP synthesis, haem  
72 synthesis, and type II fatty acid synthesis (FASII) (13). Less is known about plastid metabolic functions in  
73 other non-photosynthetic algal lineages. Many of them have a metabolic capacity similar to the apicoplast  
74 (10, 14, 15), but some house a more complex metabolism that includes amino acid biosynthesis and  
75 carbohydrate metabolism pathways (16-18). Until recently, IPP synthesis appeared to be a process  
76 conserved even in the most reduced plastids, such as the genome-lacking plastids of certain alveolates (8,  
77 19). However, non-photosynthetic plastids lacking this pathway are now documented (9, 20, 21). Thus,  
78 there generally is a metabolic reason for plastid retention, although the cases of plastid dependency differ  
79 between lineages.

80 Like their prime representative *Euglena gracilis*, most euglenophytes are mixotrophs containing  
81 complex three-membrane-bound plastids derived from a green alga (22-24). Non-photosynthetic mutants  
82 of *E. gracilis* are capable of heterotrophic living (reviewed in 7, 25) and several euglenophyte lineages  
83 independently became secondarily heterotrophic (26). The best known is *Euglena* (previously *Astasia*)  
84 *longa*, a close relative of *E. gracilis* (26, 27). Although documentation at the cytological level is spurious  
85 (28-30), molecular sequence data provide clear evidence for the presence of a cryptic plastid organelle in  
86 this species. The *E. longa* plastid genome was sequenced two decades ago (31) and shown to lack all the  
87 photosynthesis-related genes, surprisingly except for *rbcL* encoding the large subunit of ribulose-1,5-  
88 bisphosphate carboxylase/oxygenase (RuBisCO). More recently, the existence of a nucleus-encoded small  
89 RuBisCO subunit (RBCS), synthesized as a precursor polyprotein, was documented in *E. longa*, although  
90 its processing into monomers could not be demonstrated (32). The physiological role of the *E. longa*  
91 RuBisCO and the whole plastid remains unknown, but indirect evidence suggests that the plastid is  
92 essential for *E. longa* survival (33-36).

93 To provide a resource for investigating the biology of *E. longa* and its plastid, we generated a

94 transcriptome assembly and demonstrated its high completeness and utility (37). We also showed that  
95 nucleus-encoded plastidial proteins in *E. longa* employ an N-terminal plastid-targeting bipartite topogenic  
96 signal (BTS) of the same two characteristic classes as known from *E. gracilis*. The *E. longa* transcriptome  
97 revealed unusual features of the plastid biogenesis machinery shared with photosynthetic euglenophytes,  
98 but also suggested specific reductions of housekeeping functions, reflecting the loss of photosynthesis  
99 (37). Nevertheless, the anabolic and catabolic pathways localized to the *E. longa* colourless plastid have  
100 not been characterized. Hence, we set to exploit the available sequence data to chart the metabolic map of  
101 the *E. longa* plastids. The analyses were greatly facilitated by the recent characterization of the *E. gracilis*  
102 plastid metabolic network based on a proteomic analysis of the organelle (38). Our study provides the first  
103 comprehensive view of a non-photosynthetic secondary plastid of green-algal origin and shows that the  
104 metabolic capacity of the *E. longa* plastid is strikingly different from those of the apicoplast and other  
105 relic plastids characterized in sufficient detail.

106

## 107 **RESULTS**

### 108 **The plastid protein complement of *E. longa* is dramatically reduced compared to that its** 109 **photosynthetic cousin**

110 To obtain a global view of the repertoire of the plastid proteins in *E. longa*, we searched its transcriptome  
111 assembly to identify putative orthologs of the proteins defined as part of the *E. gracilis* plastid proteome  
112 (38). Of the 1,312 such proteins encoded by the *E. gracilis* nuclear genome, less than a half – namely 594  
113 – exhibited an *E. longa* transcript that met our criteria for orthology (Table S1). As expected, the  
114 functional categories with the least proportion of putative *E. longa* orthologs included “photosynthesis”,  
115 “metabolism of cofactors and vitamins”, and “reaction to oxidative and toxic stress” with 95.89%,  
116 85.11%, and 73.33% of proteins missing in *E. longa*. Interestingly, *E. longa* lacks counterparts also of  
117 some plastidial proteins involved in gene expression or genome maintenance, suggesting that the  
118 metabolic simplification, primarily the loss of photosynthesis itself with its high demand on protein  
119 turnover and mutagenic effects on the plastid genome, may have relaxed the constraints on the respective  
120 house-keeping molecular machineries.

121 Although these results clearly demonstrate dramatic reduction of the functional complexity of the  
122 *E. longa* plastid when compared to the plastid of its photosynthetic relative, they should not be interpreted  
123 such that the plastid harbours exactly the ~600 proteins identified by the orthology search. Firstly, the  
124 proteomically defined set of the putative *E. gracilis* plastid proteins is certainly affected by the presence of  
125 false negatives (bona fide plastid proteins missed by the analysis) as well as false positives (contaminants;  
126 (38). Secondly, orthology does not necessarily imply the same subcellular localization. Hence, to obtain a  
127 finer view of the physiological functions of the *E. longa* plastid, we systematically searched for homologs

128 of enzymes underpinning metabolic pathways known from plastids in general. N-terminal regions of the  
129 candidates were evaluated for characteristics of presequences predicting a specific subcellular localization  
130 to distinguish those likely representing plastid-targeted proteins from enzymes located in other  
131 compartments. Some of the bioinformatic predictions were further tested by biochemical analyses.

132  
133 ***E. longa* plastid lacks the MEP pathway of IPP biosynthesis, yet has kept the production of**  
134 **tocopherol and a phylloquinone derivative**

135 There are two parallel pathways of IPP biosynthesis in *E. gracilis* (39): the mevalonate (MVA) pathway  
136 localized to the mitochondrion (first three enzymes) and the cytosol (the rest), and the plastid-localized 2-  
137 C-methyl-D-erythritol (MEP) pathway, the latter providing precursors for synthesis of terpenoid  
138 compounds connected to photosynthesis, namely carotenoids and plastoquinone (38, 39). As expected,  
139 only enzymes of the MVA pathway were found in *E. longa* (Table S2, Fig. 1a). The carotenoid and  
140 plastoquinone biosynthesis enzymes are all missing, but surprisingly the *E. longa* plastid appears still  
141 involved in terpenoid metabolism, specifically in its phytol branch.

142 Photosynthetic eukaryotes generally produce three types of phytol derivatives, tocopherols  
143 (vitamin E), phylloquinone (PhQ; vitamin K<sub>1</sub>) and chlorophyll, starting with a common precursor phytyl-  
144 PP, which is (directly or indirectly *via* salvage of phytol liberated by chlorophyll degradation) made by  
145 reduction of geranylgeranyl-PP derived from the MEP pathway (40). *E. gracilis* proved to be unusual not  
146 only because it lacks the conventional geranylgeranyl-PP reductase (38), but also for making phytol from  
147 a precursor provided by the MVA pathway (39, 41). The route of phytol synthesis is currently unknown,  
148 though phytyl-PP might be synthesized in the *E. gracilis* plastid exclusively by the step-wise  
149 phosphorylation of phytol by phytol kinase (VTE5) and phytyl phosphate kinase (VTE6), enzymes  
150 employed in phytol salvage (38). *E. longa* has retained both VTE5 and VTE6, each being highly similar to  
151 their *E. gracilis* orthologs and exhibiting putative BTS (Fig. S1; Table S2). Since *E. longa* lacks  
152 chlorophyll and hence phytol recycling, these two enzymes are likely to participate in the *de novo*  
153 synthesis of phytol.

154 *E. gracilis* is known to make tocopherols and a PhQ derivative, 5'-monohydroxyphylloquinone  
155 (OH-PhQ; 38, 42, 43). All four enzymes mediating synthesis of  $\alpha$ -tocopherol from phytyl-PP and  
156 homogentisate were identified and are localized to its plastid (38). Interestingly, their orthologs are found  
157 in *E. longa*, all with a typical BTS or at least with the N-terminal region being highly similar to the *E.*  
158 *gracilis* counterpart (Table S2), consistent with their presumed plastidial localization (Fig. 1a).  
159 Homogentisate itself is apparently made outside the plastid, as the enzyme responsible for its synthesis (4-  
160 hydroxyphenylpyruvate dioxygenase) is not found in the *E. gracilis* plastid proteome and the respective  
161 proteins have a predicted mitochondrial transit peptide in both *E. gracilis* and *E. longa* (Table S2). To test

162 the predicted ability of *E. longa* to produce  $\alpha$ -tocopherol, we used HPLC-MS/MS to analyse extracts from  
163 this species and *E. gracilis* (grown at two different conditions – in light and in darkness) for comparison.  
164 Tocopherols were detected in both species (Fig. 1b), with  $\alpha$ -tocopherol being the dominant form present in  
165 equivalent amounts in all three samples (Fig. 1c). The signals of  $\beta$ - and/or  $\gamma$ -tocopherol (indistinguishable  
166 by the method employed) and of  $\delta$ -tocopherol suggest that tocopherol cyclase, and possibly also  
167 tocopherol O-methyltransferase, of both *Euglena* species can process substrates with or without the 3-  
168 methyl group on the benzene ring (Fig. S2).

169 The synthesis of OH-PhQ in *E. gracilis* is understood only partially, with only three enzymes of  
170 the pathway previously identified at the molecular level: the large multifunctional protein PHYLLLO,  
171 apparently localized to the cytosol and catalysing the first four steps leading to o-succinylbenzoate; MenA,  
172 catalysing phytylation of dihydroxynaphthoate localized in the plastid; and MenG  
173 (demethylnaphthoquinone methyltransferase), possessing a typical BTS but not directly confirmed as  
174 plastidial by proteomics (38). Strikingly, *E. longa* expresses orthologs of these three *E. gracilis* proteins,  
175 all with the same predicted subcellular localization (Fig. 1a, Table S2). Like in *E. gracilis*, no candidates  
176 for other enzymes required for OH-PhQ synthesis could be identified by homology searches in *E. longa*.  
177 Still, OH-PhQ could be detected in this species (Fig. 1d, Fig. S3), although with a significantly lower  
178 abundance compared to that in *E. gracilis* (Fig. 1e).

179

### 180 ***E. longa* plastid plays a limited role in the metabolism of nitrogen-containing compounds**

181 Some of the apparent peculiarities of the *E. longa* plastid do not stem from the loss of photosynthesis, but  
182 rather reflect unusual features of the plastid in euglenophytes in general. This particularly concerns plastid  
183 functions in the metabolism of nitrogen-containing compounds. Plastids are commonly involved in  
184 nitrogen assimilation due to housing nitrite reductase (44, 45), but *E. gracilis* cannot assimilate nitrate or  
185 nitrite (46, 47). Accordingly, no nitrite reductase can be identified in the transcriptome data from this  
186 species and *E. longa*. The plastids of both *Euglena* species apparently also lack the enzymes working  
187 immediately downstream of nitrite reductase, i.e. glutamine synthetase and glutamine oxoglutarate  
188 aminotransferase (the GS/GOGAT system common in plastids of other groups; 48, 49), indicating that the  
189 plastids rely on the import of organic nitrogen, similarly to what has been recently proposed for  
190 chromerids (50) and chrysophytes (20, 21).

191 A surprising feature of the *E. gracilis* plastid metabolism is the paucity of amino acid-related  
192 pathways (38). *E. longa* is even more extreme in this regard, because it lacks counterparts of the plastid-  
193 targeted serine biosynthesis enzymes. Thus, we could localize only two elements of amino acid  
194 biosynthesis pathways to the *E. longa* plastid (Fig. S4): serine/glycine hydroxymethyltransferase, whose  
195 apparent role is to provide the one-carbon moiety for formylmethionyl-tRNA synthesis required for the

196 plastidial translation; and one of the multiple isoforms of cysteine synthase A, which (like in *E. gracilis*)  
197 apparently relies on O-acetyl-L-serine synthesized outside of the plastid (see (38), and Table S3). This is  
198 not due to incompleteness of the sequence data, as the *E. longa* transcriptome encodes enzymes for the  
199 synthesis of all 20 proteinogenic amino acids, yet their predicted localization lies outside the plastid  
200 (Table S3).

201 Amino acids also serve as precursors or nitrogen donors for the synthesis of various other  
202 compounds in plastids (51, 52). This includes tetrapyrrole synthesis, which in *E. gracilis* is mediated by  
203 two parallel pathways localized to the mitochondrion/cytoplasm and the plastid (53). As described in  
204 detail elsewhere (Füssy, Záhonová, Oborník & Eliáš, unpublished), *E. longa* possesses the full  
205 mitochondrial-cytoplasmic pathway, whereas the plastidial one is restricted to its middle part potentially  
206 serving for synthesis of sirohaem, but not haem and chlorophyll (Fig. S4). The spectrum of reactions  
207 related to the metabolism of other nitrogen-containing cofactors or their precursors is very limited in the  
208 plastids of both *Euglena* spp. (Table S4). We identified only one such candidate in *E. longa* – vitamin B6  
209 salvage catalysed by pyridoxamine 5'-phosphate oxidase, whereas *E. gracilis* additionally expresses two  
210 plastid-targeted isoforms of pyridoxine 4-dehydrogenase. Enzymes of *de novo* synthesis or salvage of  
211 purines and pyrimidines are also absent from the plastid of both *Euglena* species, except for a plastidial  
212 CTP synthase isoform in *E. gracilis* (supported by proteomic data), which is not expressed by *E. longa*.  
213 The lack of *in situ* CTP production may reflect the presumably less extensive synthesis of RNA and/or  
214 CDP-diacylglycerol (a precursor of phospholipids) in the *E. longa* plastid. Finally, *E. longa* expresses an  
215 ortholog of spermidine synthase found in the plastid proteome of *E. gracilis*, but it has a modified N-  
216 terminal sequence not fitting the characteristics of a BTS, suggesting a different subcellular localization.  
217 Nevertheless, both *E. longa* and *E. gracilis* have another homolog of this enzyme with an obvious BTS, so  
218 polyamines may be produced in the *E. longa* plastid after all (Fig. S4).

219  
220 ***E. longa* plastid does not make fatty acids but maintains phospholipid and glycolipid synthesis**  
221 Eukaryotes synthesize fatty acids by a single multi-modular fatty acid synthase I (FASI) in the cytosol or  
222 by a multi-enzyme type II fatty acid synthesis complex in the plastid. *E. gracilis* possesses both systems  
223 (54), but *E. longa* encodes only a homolog of the cytosolic FASI enzyme (Fig. 2a; Table S5).  
224 Nevertheless, *E. longa* still maintains plastid-targeted versions of acyl carrier protein (ACP) and 4'-  
225 phosphopantetheinyl transferases (or holo-ACP synthase), which are crucial for the synthesis of an active  
226 form of ACP (55). This is apparently employed by the predicted plastid-targeted homologs of acyl-ACP  
227 synthetases (presumably activating fatty acids imported into the plastid) and enzymes required for the  
228 synthesis of phosphatidic acid (PA) and its subsequent conversion to phosphatidylglycerol (PG) (Fig. 2a;  
229 Table S5). Notably, *E. longa* also has a parallel, plastid-independent, route of phosphatidylglycerol

230 synthesis (Table S6).

231 No other reactions of phospholipid synthesis or decomposition beyond PG synthesis seem to  
232 operate in the *E. longa* plastid. However, enzymes for the synthesis of galactolipids  
233 monogalactosyldiacylglycerol (MGDG) and digalactosyldiacylglycerol (DGDG) were identified, all with  
234 predicted BTSs (Fig. 2a, Table S5), consistent with the plastidial localization of galactolipid synthesis in  
235 other eukaryotes (56). Moreover, both MGDG and DGDG could be detected in *E. longa* and *E. gracilis* by  
236 HPLC-MS/MS, although galactolipid levels were significantly lower in *E. longa* than in *E. gracilis* (Fig.  
237 2b). The presence of DGDG was further confirmed by immunofluorescence using an anti-DGDG  
238 antibody, which showed DGDG to be present in small foci in the *E. longa* cells (Fig. 2c), presumably  
239 representing individual small plastids. In comparison, extensive staining was observed in *E. gracilis* cells  
240 consistent with plastids occupying a large portion of the cytoplasm, whereas no staining was observed in  
241 the plastid-lacking euglenid *Rhabdomonas costata*.

242 We additionally identified another typical plastid glycolipid, sulfoquinovosyldiacylglycerol  
243 (SQDG; 57) in both *Euglena* spp. (Fig. 2b). The enzyme directly responsible for SQDG synthesis is  
244 sulfoquinovosyltransferase (Fig. 2a), but interestingly, its standard eukaryotic version (SQD2) is present  
245 only in *E. gracilis*, whereas both species share another isoform phylogenetically affiliated to bacterial  
246 SqdX (Fig. 3). To our knowledge, this is the first encounter of SqdX in any eukaryote. The presence of  
247 SQD2 only in *E. gracilis* may relate to the specific needs of its photosynthetic plastid. Indeed, *E. gracilis*  
248 contains much more SQDG compared to *E. longa* (Fig. 2b), and the profile of esterified fatty acids differs  
249 between the two species (*E. longa* lacks SQDG forms with unsaturated longer chains; Table S7).

250 The saccharide moieties of glycolipids in *E. longa* are probably also synthesized in its plastid (Fig.  
251 2a). *E. longa* exhibits an ortholog of the *E. gracilis* UDP-glucose epimerase previously identified in the  
252 plastid proteome (Fig. S5, Table S5), explaining the source of UDP-galactose for galactolipid synthesis.  
253 This seems to be an original euglenozoan enzyme recruited into the plastid (Fig. S5), but, interestingly, *E.*  
254 *gracilis* encodes also a homolog of the unique plastidial UDP-glucose epimerase (PHD1) known from  
255 plants and various algae (58). The *E. gracilis* PHD1 possesses a predicted BTS (Table S5) and is thus also  
256 likely plastidial (albeit without proteomic support). This putative redundancy is not shared by *E. longa*  
257 (Fig. 2b) and may reflect a presumably much lower need for galactolipid synthesis. The origin of the  
258 SQDG precursor UDP-sulfoquinovose in *E. longa* remains obscure, because like *E. gracilis*, it lacks the  
259 conventional UDP-sulfoquinovose synthase SQD1/SqdB and probably employs an alternative, unrelated  
260 enzyme (38). UDP-glucose, i.e. the common precursor of both UDP-galactose and UDP-sulfoquinovose,  
261 may be produced directly in the plastid of *E. gracilis*, owing to the presence of an isoform of UDP-sugar  
262 pyrophosphorylase with a typical BTS (although absent among proteomically confirmed plastid proteins).  
263 *E. longa* lacks an ortholog of this protein as well as any other potentially plastidial enzyme of UDP-



264 glucose synthesis (Table S5), suggesting import of this metabolite from the cytosol.

265

### 266 ***E. longa* plastid retains a linearized Calvin-Benson pathway**

267 The expression of both subunits of RuBisCO in *E. longa* (32) raises the question whether the Calvin-  
268 Benson (CB) cycle (CBC) as a whole has been preserved in this organism. A putative *E. longa* plastid  
269 triose-phosphate isomerase was described previously (59), and we additionally identified homologs with  
270 putative BTSs for nearly all remaining CBC enzymes (Table S8). Phylogenetic analyses (supplementary  
271 dataset S1) showed specific relationships of the *E. longa* proteins to the previously characterized CBC  
272 enzymes from other euglenophytes (60). However, two key CBC enzymes are apparently missing from  
273 the *E. longa* transcriptome: phosphoglycerate kinase (ptPGK) and glyceraldehyde-phosphate  
274 dehydrogenase (ptGAPDH). Those homologs that are present are not orthologous to the plastid-targeted  
275 isoenzymes from other euglenophytes and all clearly lack a BTS (Table S8). Hence, these are presumably  
276 cytosolic enzymes involved in glycolysis/gluconeogenesis. The lack of ptPGK and ptGAPDH in *E. longa*  
277 implies that the product of the RuBisCO carboxylase activity, 3-phosphoglycerate (3PG), cannot be  
278 converted (*via* 1,3-bisphosphoglycerate; 1,3-BPG) to glyceraldehyde-3-phosphate (GA3P) in the plastid  
279 (Fig. 4a).

280 Assuming that the reactions catalysed by fructose biphosphatase, phosphoribulokinase, and  
281 RuBisCO are irreversible (61), the flux through this linearized CB pathway goes from GA3P to 3PG, with  
282 a net production of six molecules of 3PG from five molecules of GA3P due to fixation of three CO<sub>2</sub>  
283 molecules catalysed by RuBisCO. Euglenophytes do not store starch in the plastid (62), and indeed, we  
284 did not find any glucose metabolism-related enzymes with a BTS in *E. longa*. Hence, GA3P cannot be  
285 produced by a glycolytic route in the *E. longa* plastid. The presence of the plastid-targeted glycerol-3-  
286 phosphate dehydrogenase (Table S5) in principle allows for generation of GA3P from glycerol-3-  
287 phosphate (*via* dihydroxyacetone phosphate; DHAP; Fig. 2), which could possibly come from  
288 glycerolipids turnover, but no plastidial phospholipid-degradation enzymes were found in *E. longa*.  
289 Hence, the primary function of glycerol-3-phosphate dehydrogenase perhaps is to provide glycerol-3-  
290 phosphate for the plastid phospholipid and glycolipid synthesis (see above) and the *E. longa* plastid most  
291 likely imports GA3P or DHAP from the cytosol (Fig. 4a). This assumption is supported by the presence of  
292 several members of the plastid phosphate translocator (pPT) family (Fig. S6; 63), including one  
293 phylogenetically closest to a cryptophyte transporter with a preference for DHAP (64). Concerning the  
294 opposite end of the linear CB pathway, we did not identify any *E. longa* plastid-targeted enzyme that  
295 would metabolize 3PG further, suggesting that this intermediate is exported from the plastid into the  
296 cytosol, probably also by one of the pPT transporters (Fig. 4a).

297 RuBisCO is not only a carboxylase, but also exhibits an oxygenase activity catalysing the

298 production of phosphoglycolate, which is then recycled by the photorespiration pathway; this is initiated  
299 by phosphoglycolate phosphatase, yielding glycolate (65). Indeed, *E. longa* contains an ortholog of the *E.*  
300 *gracilis* plastidial phosphoglycolate phosphatase (Table S8), but in contrast to *E. gracilis* no homolog of  
301 the glycolate transporter PLGG1 mediating glycolate export from the plastid (66) was found in *E. longa*  
302 (Table S8). Since it also lacks obvious candidates for plastid-targeted glycolate-metabolizing enzymes  
303 (glycolate oxidase, glyoxylate reductase, glycolaldehyde dehydrogenase, glyoxylate  
304 carboligase/tartronate-semialdehyde reductase), it is unclear how glycolate is removed from the *E. longa*  
305 plastid. Possibly the amount of glycolate produced is low and can be exported by an uncharacterized  
306 PLGG1-independent route that exists also in plant plastids (67) and is sufficient for glycolate recycling in  
307 the semi-parasitic plant *Cuscuta campestris* (68).

308

### 309 ***E. longa* plastid preserves the redox regulatory system of the CB pathway**

310 Although the photosynthetic machinery is missing from *E. longa* (37), we found homologs (with clear  
311 plastidial localization) of the typical “photosynthetic” (PetF-related) ferredoxin (Fd) and ferredoxin-  
312 NADP<sup>+</sup> reductase (FNR) (Table S9). These two proteins are primarily involved in passing electrons from  
313 activated photosystem I to NADP<sup>+</sup>. Euglenophyte FNR homologs belong to two different, yet related,  
314 clades (Fig. 5). One comprises the *E. longa* FNR plus its orthologs from photosynthetic euglenophytes,  
315 whereas the second one is restricted to the photosynthetic species. Two different FNR forms also exist in  
316 plants (Fig. 5), one functioning in photosynthesis (photosystem I-dependent production of NADPH) and  
317 the other “non-photosynthetic” one, allowing electron flow in the reverse direction, from NADPH to Fd  
318 (69). In analogy, we suggest that the two euglenophyte FNR forms functionally differ, one serving in  
319 photosynthesis and the other, present also in *E. longa*, mediating light-independent production of the  
320 reduced Fd. Multiple plastid anabolic enzymes depend on reduced Fd as an electron donor (4), but none of  
321 them seems to account for the presence of FNR and Fd in the *E. longa* plastid: glutamate synthase and  
322 nitrite reductase are missing, all identified lipid desaturases are predicted as mitochondrion- or ER-  
323 targeted (Table S5) and sulfite reductase, like the one previously identified in the plastid of *E. gracilis*  
324 (38), is NADPH-dependent (Table S5).

325 Fd also provides electrons to ferredoxin:thioredoxin reductase (FTR) mediating reduction of the  
326 protein thioredoxin (Trx). The Fd/Trx system regulates several CBC enzymes in response to the stromal  
327 redox status, whereby an excess of NADPH leads to electrons being relayed from Fd *via* Trx to certain  
328 disulfide bonds in the target enzymes to activate them (Fig. 4a; 70). Notably, FTR and Trx homologs with  
329 an evident BTS are present in *E. longa* (Table S9), and specific motifs necessary for the function of the  
330 Fd/Trx system are conserved in the respective *E. longa* proteins (Fig. S7). In addition, three *E. longa* CBC  
331 enzymes, fructose bisphosphatase (two of the three isoforms present), sedoheptulose bisphosphatase, and

332 phosphoribulokinase, exhibit the conserved Trx regulatory cysteine motifs, similar to their orthologs in *E.*  
333 *gracilis* (Fig. S7, Table S10). Thus, the *E. longa* CB pathway is likely to be sensitive to the redox status in  
334 the plastid, specifically to the concentration of NADPH (Fig. 4a).

335  
336 **DISCUSSION**  
337 The analyses described above provide evidence for the cryptic *E. longa* plastid harbouring highly non-  
338 conventional combination of metabolic functions. Lacking the plastidial MEP pathway, *E. longa* joins the  
339 only recently discovered group of plastid-bearing eukaryotes with such a deficit, namely the colourless  
340 diatom *Nitzschia* sp. NIES-3581 (9) and various colourless chrysophytes (20, 21). An obvious explanation  
341 for this is that the cytosolic MVA pathway is sufficient to supply precursors for all cellular isoprenoids in  
342 these organisms. In contrast, the MEP pathway in apicomplexans and related alveolates (i.e. Myzozoa; 8),  
343 and in diverse non-photosynthetic chlorophytes (71), is essential, since the cytosolic MVA pathway was  
344 lost in these groups (72, 73). Strikingly, the *E. longa* plastid is still involved in isoprenoid metabolism,  
345 namely the synthesis of tocopherols and OH-PhQ. Like in *E. gracilis*, pathway leading to OH-PhQ cannot  
346 be presently reconstructed in full detail in either *Euglena* spp. (see also 38). Both euglenophytes studied  
347 lack homologs of the conventional enzymes of the middle part of the pathway (from *o*-succinylbenzoate to  
348 dihydroxynaphthoate) typically localized in the peroxisome (74). The respective enzyme activities were  
349 found associated with the plastid envelope in *E. gracilis* (75), suggesting an alternative solution that may  
350 hold for *E. longa*, too. The molecular identity of the putative PhQ hydroxylase (making OH-PhQ) is  
351 unknown, so its plastidial localization in *E. gracilis* or *E. longa* cannot be ascertained. Finally, a  
352 previously unknown step – reduction of the naphthoquinone ring – was demonstrated as a prerequisite for  
353 the reaction catalysed by MenG to proceed in plants and cyanobacteria (76). The respective reductase is  
354 well conserved among diverse cyanobacteria, algae and plants (74), but we did not identify close  
355 homologs in any of the euglenophyte transcriptome assemblies, suggesting that euglenophytes employ an  
356 unknown alternative enzyme.

357 *E. longa* seems to be the first eukaryote with a non-photosynthetic plastid documented to have  
358 retained the pathways for tocopherols and OH-PhQ synthesis. The presence of tocopherols in *E. longa* is  
359 not that surprising, as they are not restricted to photosynthetic tissues in plants and were detected also in  
360 non-photosynthetic *E. gracilis* mutants (42, 77). As potent lipophilic antioxidants, tocopherols might be  
361 employed by *E. longa* to protect its membrane lipids against reactive oxygen species generated by  
362 mitochondria and peroxisomes. The retention of OH-PhQ synthesis in *E. longa* is more puzzling, as the  
363 best-established role of (OH-)PhQ in plants and algae is its functioning as an electron carrier within the  
364 photosystem I (43, 78). PhQ was additionally proposed to serve as an electron acceptor required for proper  
365 function of photosystem II (79, 80). A homolog of the respective oxidoreductase (LTO1) is present in *E.*

366 *gracilis* (Table S2), but not in the transcriptomic data from *E. longa*. Interestingly, in plants PhQ was also  
367 detected in the plasma membrane and proposed to be involved in photosynthesis-unrelated redox  
368 processes (81-83). However, the MenA and MenG enzymes in *E. longa* carry a typical BTS, so we  
369 suggest that OH-PhQ in *E. longa* is involved in a hitherto uncharacterized, photosynthesis-unrelated  
370 plastid-resident process.

371 The absence of the type II fatty acid synthesis in the *E. longa* plastid is noteworthy, yet not  
372 unprecedented, since it has been also reported for the non-photosynthetic plastids of certain myzozoans (8)  
373 and a chrysophyte (20). Still, the *E. longa* plastid plays an active role in the lipid metabolism, having  
374 retained biosynthesis of several glycerolipid types, including galactolipids and SQDG. These were  
375 previously documented in several non-photosynthetic algae, e.g. colourless diatoms (84, 85). On the other  
376 hand, the apicoplast (86, 87), and most likely also the relic plastid of *Helicosporidium* (based on our  
377 analysis of the respective genome data reported by 17), lack galactolipid and SQDG synthesis completely.  
378 The reason for the differential retention of these lipids in different colourless plastids remains to be  
379 investigated further.

380 The truly striking feature of the *E. longa* plastid is the retention of nearly all CBC enzymes  
381 (assembling a putative linear CB pathway) and the mechanism of their redox regulation. In fact, the  
382 presence of CBC enzymes have been reported from a set of unrelated colourless algae and plants. Some of  
383 them, e.g. the dinoflagellate *Cryptocodinium cohnii*, dictyochophytes *Pteridomonas danica* and  
384 *Ciliophrys infusionum*, the cryptophyte *Cryptomonas paramecium*, and some parasitic or  
385 mycoheterotrophic land plants, are known to encode RuBisCO (7, 15, 88-90), but the actual complement  
386 of other CBC enzymes in these species is unknown. In contrast, transcriptomic or genomic analyses of  
387 other colourless plastid-bearing taxa, such as the dinoflagellate *Pfiesteria piscicida*, the chlorophyte  
388 *Helicosporidium* sp. ATCC50920, the diatom *Nitzschia* sp. NIES-3581, and the non-photosynthetic  
389 chrysophytes, revealed the presence of a subset of CBC enzymes, including ptPGK and ptGAPDH, but  
390 not of RuBisCO (9, 17, 21, 91). Hence, the constellation of the CBC enzymes present in the *E. longa*  
391 plastid is unique.

392 The CBC enzymes retained in various non-photosynthetic eukaryotes obviously do not serve to  
393 sustain autotrophic growth due to lack of photosynthetic production of ATP and NADPH. The incomplete  
394 CBC in *Nitzschia* was proposed to provide erythrose-4-P for the synthesis of aromatic amino acid *via* the  
395 shikimate pathway (9). The data provided for the *Helicosporidium* plastid (17) offer the same explanation  
396 of the retention of several CBC enzyme. However, such rationalization cannot hold for *E. longa*, since  
397 aromatic amino acid biosynthesis in this species apparently localizes to the cytosol (Table S3) and thus  
398 has an access to erythrose-4-P produced by the pentose phosphate pathway. In addition, *E. longa* differs  
399 from both *Nitzschia* and *Helicosporidium* by the retention of RuBisCO. A photosynthesis- and CBC-

400 independent role of RuBisCO was described in oil formation in developing seeds of *Brassica napus*,  
401 where refixation of CO<sub>2</sub> released during carbohydrate-to-fatty acid conversion increases carbon use  
402 efficiency (92). The absence of fatty acid synthesis in the *E. longa* plastid makes a similar function of  
403 RuBisCO unlikely in this organism.

404 The identification of the Fd/Trx system in the *E. longa* plastid, despite the absence of  
405 photosynthesis, may thus be a key for understanding the physiological role of the linear CB pathway in *E.*  
406 *longa*. Another hint is provided by the discovery of a unique (non-phosphorylating) form of GAPDH,  
407 referred to as GapN, in the *E. gracilis* plastid (38). This enzyme uses NADP<sup>+</sup> to directly oxidize GA3P to  
408 3PG without ATP generation (93). In plants, GapN is cytosolic and involved in shuttling of reducing  
409 equivalents from the plastid by the exchange of GA3P and 3PG between the two compartments (94). *E.*  
410 *longa* possesses a protein orthologous to the *E. gracilis* GapN with predicted BTS (Table S8), suggesting  
411 its plastidial localization. It thus appears that in *Euglena* spp., GapN mediates shuttling of reducing  
412 equivalents in the opposite direction than in plants, i.e. from the cytosol to the plastid (Fig. 4a). In case of  
413 *E. longa* this may be the main (if not the only) mechanism of providing NADPH for the use in the plastid,  
414 whereas *E. gracilis* would utilize it when photosynthetic NADPH production is shut down. At the same  
415 time, the shuttle provides a mechanism of linking the level of NADPH in the plastid with the cytosolic  
416 concentration of GA3P.

417 Taken together, we propose that in *E. longa* (and, at specific circumstances, possibly also in *E.*  
418 *gracilis*), the plastidial NADPH/NADP<sup>+</sup> ratio is directly influenced by the redox status of the cell, i.e. that  
419 it rises in an excess of reducing power that slows down the glycolytic oxidation of GA3P in the cytosol.  
420 This stimulates the linear CB pathway *via* the Fd/Trx system, effectively decreasing the level of GA3 by  
421 converting it to 3PG without further increasing the reducing power in the cell. This conclusion is apparent  
422 from considering the overall stoichiometries of the two alternative pathways from GA3 to 3PG (Fig. 4b).  
423 The key difference is that the CB pathway does not produce NADH that needs to be reoxidized to keep the  
424 glycolytic pathway running, since the fixed CO<sub>2</sub> effectively serves as an electron acceptor. Hence, turning  
425 the CB bypass on may help the cell to keep the redox balance when reoxidation of NADH is not efficient,  
426 e.g. at hypoxic (or anoxic) conditions (although this happens at the expense of ATP). Indeed,  
427 euglenophytes in their natural settings are probably often exposed to the shortage of oxygen, and  
428 anaerobiosis in *E. gracilis* has been studied to some extent (54, 95). The anaerobic heterotrophic  
429 metabolism of *E. gracilis* relies on fermentative degradation of paramylon leading to production of wax  
430 esters (96). It is likely that *E. longa* exhibits a similar metabolic adaptation to low oxygen levels as *E.*  
431 *gracilis*. However, details of the euglenophyte anaerobic metabolism need to be investigated further, and  
432 we propose that the plastid may be involved in it as a "redox valve".

433 Compared to the range of forms mitochondria may exhibit in diverse eukaryotes (97), plastids

434 seem to be much more uniform. However, this is partly a reflection of our ignorance about plastid biology  
435 in most algal groups, and recent studies of various independently evolved colourless plastids document a  
436 surprising degree of diversity in terms of their metabolic capacity. Our analyses of the *E. longa* plastid  
437 stretch the breadth of variation among non-photosynthetic plastids even further. The combination of  
438 pathways present (tocopherol and phylloquinone synthesis, glycolipid synthesis and a linearized CB  
439 pathway including RuBisCO), absent (fatty acid, amino acid, and isoprenoid precursor synthesis), and  
440 truncated (tetrapyrrole synthesis; Füssy, Záhonová, Oborník & Eliáš, unpublished) makes the *E. longa*  
441 plastid unlike any of the previously investigated non-photosynthetic plastids, including the apicoplast.  
442 However, further work, combining additional *in silico* analyses (aimed, e.g., at potential plastid membrane  
443 transporters mediating metabolite exchange with the cytosol) with biochemical and cytological  
444 investigations is needed to achieve a more precise idea about the protein composition of the *E. longa*  
445 plastid and a better understanding of its physiological roles.

446

## 447 **MATERIALS AND METHODS**

### 448 **Identification and annotation of plastid-targeted proteins**

449 The analyses utilized the *E. longa* transcriptome assembly reported previously, with candidates for plastid-  
450 targeted proteins identified as described in (37), including careful manual curation of the sequences and, if  
451 needed, revision of the 5'-ends of the transcripts by targeted searches of unassembled sequencing reads.  
452 Protein models with a putative BTS were automatically annotated using InterProScan 5.21 (98). Potential  
453 plastid enzymes (references from the KEGG PATHWAY Database,  
454 <https://www.genome.jp/kegg/pathway.html>) or sequences identified by literature searches, and plastid  
455 proteins identified by (38) were searched using BLAST v.2.2.30 (against the conceptually translated  
456 proteome, the transcriptome assembly and RNA-seq reads). HMMER 3.0 (99) was used when BLAST did  
457 not yield expected candidate homologs. For comparative purposes we used the same approach to identify  
458 plastid-targeted proteins encoded by the transcriptome assemblies from *E. gracilis* reported by (96)  
459 (accession GDJR00000000.1) and (100) (accession GEFR00000000.1).

460 To identify orthologs of the proteins from *E. gracilis* plastid proteome (38) in *E. longa*, these were  
461 used as queries in reciprocal BLAST searches. Briefly, *E. gracilis* proteins identified in its plastid  
462 proteome were used as queries in tBLASTn searches in *E. longa* transcriptome with E-value cut-off 0.1.  
463 Each respective best BLAST hit from *E. longa* was then used as a query to search the whole *E. gracilis*  
464 transcriptomic database and was classified as an ortholog if it retrieved the original *E. gracilis* query as a  
465 first hit. Results are summarized in Table S1.

466 For MenA cDNA resequencing, mRNA was extracted using the TRI Reagent and Dynabeads  
467 mRNA Purification kit (both from Thermo Fisher Scientific, Waltham, USA). Reverse-transcription was

468 performed with random hexamers and StrataScript III Reverse Transcriptase (Thermo Fisher Scientific).  
469 The target was amplified using forward 5'-GGTGCTGTTCTGCTCTCACT-3' and reverse 5'-  
470 CAGTGGGGATCAGAGATGCG-3' primers, and Q5 High-Fidelity DNA polymerase in a standard buffer  
471 (New England Biolabs, Ipswich, USA). Amplicons were purified on MinElute PCR Purification columns  
472 (Qiagen, Hilden, Germany) and sequenced at the GATC sequencing facility (Konstanz, Germany). The  
473 MenA cDNA sequence is deposited in GenBank (MK484704).

474  
475 **Phylogenetic analyses**  
476 Homologs of target proteins were identified by BLAST v.2.2.30 searches in the non-redundant protein  
477 sequence database at NCBI ([www.ncbi.nlm.nih.gov](http://www.ncbi.nlm.nih.gov)) and among protein models of selected organisms  
478 from JGI ([jgi.doe.gov](http://jgi.doe.gov)) and MMETSP ([marinemicroeukaryotes.org](http://marinemicroeukaryotes.org); 101). Datasets were processed using  
479 an in-house script (<https://github.com/morpholino/Phylohandler>) as follows. Sequences were aligned using  
480 the MAFFT v7.407 tool with L-INS-I setting (102) and poorly aligned positions were eliminated using  
481 trimAl v1.4.rev22 with “-automated1” trimming (103). For presentation purposes, alignments were  
482 processed using CHROMA (104). Maximum likelihood trees were inferred using the LG+F+G4 model of  
483 IQ-TREE v1.6.9 (105), employing the strategy of rapid bootstrapping followed by a “thorough” likelihood  
484 search with 1,000 bootstrap replicates. The list of species, and the number of sequences and amino acid  
485 positions are present in Tables S11-S22 for each phylogenetic tree.

486  
487 **Culture conditions**  
488 *Euglena gracilis* strain Z (“autotrophic” conditions) was cultivated statically under constant illumination  
489 at 26 °C in Cramer-Myers medium with ethanol (0.8% v/v) as a carbon source (106). *E. longa* strain  
490 CCAP 1204-17a (a gift from Wolfgang Hachtel, Bonn, Germany) and heterotrophic *E. gracilis* strain Z  
491 were cultivated as above, but without illumination. *Rhabdomonas costata* strain PANT2 (a gift from  
492 Vladimír Hampl, Charles University, Prague, Czech Republic) was isolated from a freshwater body in  
493 Pantanal (Brazil) and grown with an uncharacterised mixture of bacteria in Sonneborn's *Paramecium*  
494 medium, pH 7.4 (107) at room temperature.

495  
496 **Mass spectrometry of structural lipids and terpenoids**  
497 Lipid extracts from *E. longa* and autotrophically grown *E. gracilis* cellular pellets (four biological samples  
498 of different culture ages) were obtained with procedures described in (108). Briefly, approximately 10 mg  
499 (wet weight) of both harvested cultures were homogenized by using a TissueLyser LT mill (Qiagen) and  
500 extraction was performed by chloroform and methanol solution (ratio – 2:1) following the previously  
501 described method (109). Aliquots from each sample were subjected to HPLC MS system powered by a

502 linear ion trap LTQ-XL mass spectrometer (Thermo Fisher Scientific). The settings of the system  
503 followed the methodology published earlier (108). Data were acquired and processed using Xcalibur  
504 software version 2.1 (Thermo Fisher Scientific). Particular compounds were determined based on earlier  
505 publication (108). Terpenoids were extracted from an autotrophic and heterotrophic culture of *E. gracilis*,  
506 and a culture of *E. longa* of the same age in three replicates. The same extraction protocol as for lipid  
507 analysis was used. Sample aliquots were injected into the high-resolution mass spectrometry system  
508 powered by Orbitrap Q-Exactive Plus with Dionex Ultimate 3000 XRS pump and Dionex Ultimate 3000  
509 XRS Open autosampler (both from Thermo Fisher Scientific) and followed the settings described in (108).  
510 Data were acquired and processed using Xcalibur software version 2.1. Identification of OH-PhQ was  
511 done by considering the m/z value, fragmentation pattern, and high-resolution data. Tocopherols ( $\alpha$ ,  $\beta/\gamma$ ,  
512 and  $\delta$ ) were determined by the same characteristics as OH-PhQ and results were then compared with  
513 commercially purchased standards (Sigma-Aldrich, St. Louis, USA).

514  
515 **Immunofluorescence assay**  
516 Immunofluorescence was performed as described previously (110). Briefly, cells were fixed in 4%  
517 paraformaldehyde for 30 minutes, permeabilized for 10 minutes on ice with 0.1% Igepal CA-630 (Sigma-  
518 Aldrich) in PHEM buffer pH 6.9 (60 mM PIPES, 25 mM HEPES, 10 mM EGTA, 2 mM MgCl<sub>2</sub>), and  
519 background was masked with 3% BSA in PHEM buffer. DGDG was detected using a polyclonal rabbit  
520 anti-DGDG antibody (1:25), a kind gift from Cyrille Y. Botté (University of Grenoble I, Grenoble,  
521 France), followed by incubation with a secondary Cy3-labeled polyclonal goat anti-rabbit antibody  
522 (AP132C, 1:800, Merck Millipore, Burlington, USA). Cells were mounted on slides using Fluoroshield™  
523 with DAPI mounting medium (Sigma-Aldrich) and observed with an Olympus BX53 microscope  
524 (Olympus, Tokyo, Japan).

525  
526 **ACKNOWLEDGEMENTS**  
527 We thank Vladimír Hampl for the culture of *Rhabdomonas costata* and Cyrille Y. Botté for the anti-  
528 DGDG antibody. We acknowledge the infrastructure grant “Přístroje IET” (CZ.1.05/2.1.00/19.0388).  
529 Computational resources were supplied by the Ministry of Education, Youth and Sports of the Czech  
530 Republic under the Projects CESNET (Project No. LM2015042) and CERIT-Scientific Cloud (Project No.  
531 LM2015085) provided within the program Projects of Large Research, Development and Innovations  
532 Infrastructures. We thank Laboratory of Analytical Biochemistry and Metabolomics (Biology Centre  
533 ASCR) for an access to LC–MS instruments. This study was supported by the Czech Science Foundation  
534 grants 17-21409S (to ME) and 18-13458S (to MO), ERD Funds (the project CePaViP;  
535 CZ.02.1.01/0.0/0.0/16\_019/0000759) and the Scientific Grant Agency of the Slovak Ministry of



536 Education (grant VEGA 1/0535/17 to JK).

537

## 538 REFERENCES

- 539 1. Keeling PJ. 2013. The number, speed, and impact of plastid endosymbioses in eukaryotic evolution.  
540 *Annu Rev Plant Biol* 64:583-607.
- 541 2. McFadden GI. 2014. Origin and evolution of plastids and photosynthesis in eukaryotes. *Cold Spring*  
542 *Harb Perspect Biol* 6:a016105.
- 543 3. Ponce-Toledo RI, Deschamps P, Lopez-Garcia P, Zivanovic Y, Benzerara K, Moreira D. 2017. An  
544 early-branching freshwater cyanobacterium at the origin of plastids. *Curr Biol* 27:386-391.
- 545 4. Neuhaus HE, Emes MJ. 2000. Nonphotosynthetic metabolism in plastids. *Annu Rev Plant Physiol*  
546 *Plant Mol Biol* 51:111-140.
- 547 5. Oborník M, Green BR. 2005. Mosaic origin of the heme biosynthesis pathway in photosynthetic  
548 eukaryotes. *Mol Biol Evol* 22:2343-53.
- 549 6. Van Dingenen J, Blomme J, Gonzalez N, Inzé D. 2016. Plants grow with a little help from their  
550 organelle friends. *J Exp Bot* 67:6267-6281.
- 551 7. Hadariová L, Vesteg M, Hampl V, Krajčovič J. 2018. Reductive evolution of chloroplasts in non-  
552 photosynthetic plants, algae and protists. *Curr Genet* 64:365-387.
- 553 8. Janouškovec J, Tikhonenkov DV, Burki F, Howe AT, Kolínsko M, Mylnikov AP, Keeling PJ. 2015.  
554 Factors mediating plastid dependency and the origins of parasitism in apicomplexans and their close  
555 relatives. *Proc Natl Acad Sci U S A* 112:10200-7.
- 556 9. Kamikawa R, Moog D, Zauner S, Tanifuji G, Ishida KI, Miyashita H, Mayama S, Hashimoto T,  
557 Maier UG, Archibald JM, Inagaki Y. 2017. A non-photosynthetic diatom reveals early steps of  
558 reductive evolution in plastids. *Mol Biol Evol* 34:2355-2366.
- 559 10. Slamovits CH, Keeling PJ. 2008. Plastid-derived genes in the nonphotosynthetic alveolate *Oxyrrhis*  
560 *marina*. *Mol Biol Evol* 25:1297-306.
- 561 11. McFadden GI, Yeh E. 2017. The apicoplast: now you see it, now you don't. *Int J Parasitol* 47:137-  
562 144.
- 563 12. Miller LH, Ackerman HC, Su XZ, Wellem's TE. 2013. Malaria biology and disease pathogenesis:  
564 insights for new treatments. *Nat Med* 19:156-67.
- 565 13. Lim L, McFadden GI. 2010. The evolution, metabolism and functions of the apicoplast. *Philos Trans*  
566 *R Soc Lond B Biol Sci* 365:749-63.
- 567 14. Fernández Robledo JA, Caler E, Matsuzaki M, Keeling PJ, Shanmugam D, Roos DS, Vasta GR.  
568 2011. The search for the missing link: a relic plastid in *Perkinsus*? *Int J Parasitol* 41:1217-29.
- 569 15. Sanchez-Puerta MV, Lippmeier JC, Apt KE, Delwiche CF. 2007. Plastid genes in a non-

- 570 photosynthetic dinoflagellate. *Protist* 158:105-17.
- 571 16. Borza T, Popescu CE, Lee RW. 2005. Multiple metabolic roles for the nonphotosynthetic plastid of  
572 the green alga *Prototheca wickerhamii*. *Eukaryot Cell* 4:253-61.
- 573 17. Pombert JF, Blouin NA, Lane C, Boucias D, Keeling PJ. 2014. A lack of parasitic reduction in the  
574 obligate parasitic green alga *Helicosporidium*. *PLoS Genet* 10:e1004355.
- 575 18. Smith DR, Lee RW. 2014. A plastid without a genome: evidence from the nonphotosynthetic green  
576 algal genus *Polytomella*. *Plant Physiol* 164:1812-9.
- 577 19. Matsuzaki M, Kuroiwa H, Kuroiwa T, Kita K, Nozaki H. 2008. A cryptic algal group unveiled: a  
578 plastid biosynthesis pathway in the oyster parasite *Perkinsus marinus*. *Mol Biol Evol* 25:1167-79.
- 579 20. Dorrell RG, Azuma T, Nomura M, Audren de Kerdrel G, Paoli L, Yang S, Bowler C, Ishii KI,  
580 Miyashita H, Gile GH, Kamikawa R. 2019. Principles of plastid reductive evolution illuminated by  
581 nonphotosynthetic chrysophytes. *Proc Natl Acad Sci U S A* 116:6914-6923.
- 582 21. Graupner N, Jensen M, Bock C, Marks S, Rahmann S, Beisser D, Boenigk J. 2018. Evolution of  
583 heterotrophy in chrysophytes as reflected by comparative transcriptomics. *FEMS Microbiol Ecol* 94.
- 584 22. Jackson C, Knoll AH, Chan CX, Verbruggen H. 2018. Plastid phylogenomics with broad taxon  
585 sampling further elucidates the distinct evolutionary origins and timing of secondary green plastids.  
586 *Sci Rep* 8:1523.
- 587 23. Leander BS, Esson HJ, Breglia SA. 2007. Macroevolution of complex cytoskeletal systems in  
588 euglenids. *Bioessays* 29:987-1000.
- 589 24. Turmel M, Gagnon MC, O'Kelly CJ, Otis C, Lemieux C. 2009. The chloroplast genomes of the green  
590 algae *Pyramimonas*, *Monomastix*, and *Pycnococcus* shed new light on the evolutionary history of  
591 prasinophytes and the origin of the secondary chloroplasts of euglenids. *Mol Biol Evol* 26:631-48.
- 592 25. Krajčovič J, Ebringer L, Schwartzbach SD. 2002. Reversion of endosymbiosis?, p 185-206. *In*  
593 Seckbach J (ed), *Symbiosis: Mechanisms and model systems* doi:10.1007/0-306-48173-1\_11.  
594 Springer Netherlands, Dordrecht.
- 595 26. Marin B, Palm A, Klingberg M, Melkonian M. 2003. Phylogeny and taxonomic revision of plastid-  
596 containing euglenophytes based on SSU rDNA sequence comparisons and synapomorphic signatures  
597 in the SSU rRNA secondary structure. *Protist* 154:99-145.
- 598 27. Nudelman MA, Rossi MS, Conforti V, Triemer RE. 2003. Phylogeny of Euglenophyceae based on  
599 small subunit rDNA sequences: Taxonomic implications. *J Phycol* 39:226-235.
- 600 28. Hachtel W. 1996. DNA and gene expression in nonphotosynthetic plastids, p 349-355. *In* Pessaraki  
601 M (ed), *Handbook of Photosynthesis*. Marcel Dekker, New York.
- 602 29. Kivic PA, Vesik M. 1974. An electron microscope search for plastids in bleached *Euglena gracilis*  
603 and in *Astasia longa*. *Can J Bot* 52:695-699.

- 604 30. Webster DA, Hackett DP, Park RB. 1967. The respiratory chain of colorless algae: III. Electron  
605 microscopy. *J Ultrastruct Res* 21:514-523.
- 606 31. Gockel G, Hachtel W. 2000. Complete gene map of the plastid genome of the nonphotosynthetic  
607 euglenoid flagellate *Astasia longa*. *Protist* 151:347-51.
- 608 32. Záhonová K, Füssy Z, Oborník M, Eliáš M, Yurchenko V. 2016. RuBisCO in non-photosynthetic  
609 alga *Euglena longa*: divergent features, transcriptomic analysis and regulation of complex formation.  
610 *PLoS One* 11:e0158790.
- 611 33. Gockel G, Hachtel W, Baier S, Fliss C, Henke M. 1994. Genes for components of the chloroplast  
612 translational apparatus are conserved in the reduced 73-kb plastid DNA of the nonphotosynthetic  
613 euglenoid flagellate *Astasia longa*. *Curr Genet* 26:256-62.
- 614 34. Hadariová L, Vesteg M, Birčák E, Schwartzbach SD, Krajčovič J. 2017. An intact plastid genome is  
615 essential for the survival of colorless *Euglena longa* but not *Euglena gracilis*. *Curr Genet* 63:331-  
616 341.
- 617 35. Siemeister G, Buchholz C, Hachtel W. 1990. Genes for ribosomal proteins are retained on the 73 kb  
618 DNA from *Astasia longa* that resembles *Euglena* chloroplast DNA. *Curr Genet* 18:457-64.
- 619 36. Siemeister G, Buchholz C, Hachtel W. 1990. Genes for the plastid elongation factor Tu and  
620 ribosomal protein S7 and six tRNA genes on the 73 kb DNA from *Astasia longa* that resembles the  
621 chloroplast DNA of *Euglena*. *Mol Gen Genet* 220:425-32.
- 622 37. Záhonová K, Füssy Z, Birčák E, Novák Vanclová AMG, Klimeš V, Vesteg M, Krajčovič J, Oborník  
623 M, Eliáš M. 2018. Peculiar features of the plastids of the colourless alga *Euglena longa* and  
624 photosynthetic euglenophytes unveiled by transcriptome analyses. *Sci Rep* 8:17012.
- 625 38. Novák Vanclová AMG, Zoltner M, Kelly S, Soukal P, Záhonová K, Füssy Z, Ebenezer TE, Lacová  
626 Dobáková E, Eliáš M, Lukeš J, Field M, Hampl V. 2019. Metabolic quirks and the colourful history  
627 of the *Euglena gracilis* secondary plastid. *New Phytologist* accepted.
- 628 39. Kim D, Filtz MR, Proteau PJ. 2004. The methylerythritol phosphate pathway contributes to  
629 carotenoid but not phytol biosynthesis in *Euglena gracilis*. *J Nat Prod* 67:1067-9.
- 630 40. Gutbrod K, Romer J, Dormann P. 2019. Phytol metabolism in plants. *Prog Lipid Res* 74:1-17.
- 631 41. Disch A, Schwender J, Muller C, Lichtenthaler HK, Rohmer M. 1998. Distribution of the mevalonate  
632 and glyceraldehyde phosphate/pyruvate pathways for isoprenoid biosynthesis in unicellular algae and  
633 the cyanobacterium *Synechocystis* PCC 6714. *Biochem J* 333 ( Pt 2):381-8.
- 634 42. Watanabe F, Yoshimura K, Shigeoka S. 2017. Biochemistry and physiology of vitamins in *Euglena*,  
635 p 65-90. In Schwartzbach SD, Shigeoka S (ed), *Euglena: Biochemistry, cell and molecular biology*,  
636 vol 979. Springer International Publishing, Cham.
- 637 43. Ziegler K, Maldener I, Lockau W. 1989. 5'-monohydroxyphyloquinone as a component of

- 638 photosystem I. Zeitschrift für Naturforschung C 44:468-472.
- 639 44. Giordano M, Raven JA. 2014. Nitrogen and sulfur assimilation in plants and algae. *Aquatic Botany*
- 640 118:45-61.
- 641 45. Sanz-Luque E, Chamizo-Ampudia A, Llamas A, Galvan A, Fernandez E. 2015. Understanding
- 642 nitrate assimilation and its regulation in microalgae. *Front Plant Sci* 6:899.
- 643 46. Kitaoka S, Nakano Y, Miyatake K, Yokota A. 1989. Enzymes and their functional location, p 1-135.
- 644 *In* Buetow DE (ed), *Subcellular biochemistry and molecular biology*
- 645 doi:<https://doi.org/10.1016/B978-0-12-139904-7.50007-5>. Academic Press.
- 646 47. Oda Y, Miyatake K, Kitaoka S. 1979. Inability of *Euglena gracilis* Z to utilize nitrate, nitrite and urea
- 647 as the nitrogen sources. *Bulletin of the University of Osaka Prefecture Series B Agriculture and*
- 648 *Biology* 31:43-48.
- 649 48. Dagenais-Bellefeuille S, Morse D. 2013. Putting the N in dinoflagellates. *Front Microbiol* 4:369.
- 650 49. Fernandez E, Galvan A. 2008. Nitrate assimilation in *Chlamydomonas*. *Eukaryot Cell* 7:555-9.
- 651 50. Füssy Z, Faitová T, Oborník M. 2019. Subcellular compartments interplay for carbon and nitrogen
- 652 allocation in *Chromera velia* and *Vitrella brassicaformis*. *Genome Biol Evol* 11:1765-1779.
- 653 51. Gerdes S, Lerma-Ortiz C, Frelin O, Seaver SM, Henry CS, de Crecy-Lagard V, Hanson AD. 2012.
- 654 Plant B vitamin pathways and their compartmentation: a guide for the perplexed. *J Exp Bot* 63:5379-
- 655 95.
- 656 52. Moffatt BA, Ashihara H. 2002. Purine and pyrimidine nucleotide synthesis and metabolism.
- 657 *Arabidopsis Book* 1:e0018.
- 658 53. Kořený L, Oborník M. 2011. Sequence evidence for the presence of two tetrapyrrole pathways in
- 659 *Euglena gracilis*. *Genome Biol Evol* 3:359-64.
- 660 54. Zimorski V, Rauch C, van Hellemond JJ, Tielens AGM, Martin WF. 2017. The mitochondrion of
- 661 *Euglena gracilis*, p 19-37. *In* Schwartzbach SD, Shigeoka S (ed), *Euglena: Biochemistry, cell and*
- 662 *molecular biology*, vol 979. Springer International Publishing, Cham.
- 663 55. Lambalot RH, Walsh CT. 1995. Cloning, overproduction, and characterization of the *Escherichia coli*
- 664 holo-acyl carrier protein synthase. *J Biol Chem* 270:24658-61.
- 665 56. Yuzawa Y, Nishihara H, Haraguchi T, Masuda S, Shimojima M, Shimoyama A, Yuasa H, Okada N,
- 666 Ohta H. 2012. Phylogeny of galactolipid synthase homologs together with their enzymatic analyses
- 667 revealed a possible origin and divergence time for photosynthetic membrane biogenesis. *DNA Res*
- 668 19:91-102.
- 669 57. Hori K, Nobusawa T, Watanabe T, Madoka Y, Suzuki H, Shibata D, Shimojima M, Ohta H. 2016.
- 670 Tangled evolutionary processes with commonality and diversity in plastidial glycolipid synthesis in
- 671 photosynthetic organisms. *Biochim Biophys Acta* 1861:1294-1308.

- 672 58. Li C, Wang Y, Liu L, Hu Y, Zhang F, Mergen S, Wang G, Schlappi MR, Chu C. 2011. A rice  
673 plastidial nucleotide sugar epimerase is involved in galactolipid biosynthesis and improves  
674 photosynthetic efficiency. *PLoS Genet* 7:e1002196.
- 675 59. Sun GL, Shen W, Wen JF. 2008. Triosephosphate isomerase genes in two trophic modes of  
676 euglenoids (euglenophyceae) and their phylogenetic analysis. *J Eukaryot Microbiol* 55:170-7.
- 677 60. Markunas CM, Triemer RE. 2016. Evolutionary history of the enzymes involved in the Calvin-  
678 Benson cycle in euglenids. *J Eukaryot Microbiol* 63:326-39.
- 679 61. Raines CA, Lloyd JC. 2001. C3 carbon reduction cycle, eLS doi:10.1038/npg.els.0001314. John  
680 Wiley & Sons, Ltd.
- 681 62. Kiss JZ, Vasconcelos AC, Triemer RE. 1987. Structure of the euglenoid storage carbohydrate,  
682 paramylon. *Am J Bot* 74:877-882.
- 683 63. Facchinelli F, Weber AP. 2011. The metabolite transporters of the plastid envelope: an update. *Front*  
684 *Plant Sci* 2:50.
- 685 64. Haferkamp I, Deschamps P, Ast M, Jeblick W, Maier U, Ball S, Neuhaus HE. 2006. Molecular and  
686 biochemical analysis of periplastidial starch metabolism in the cryptophyte *Guillardia theta*.  
687 *Eukaryot Cell* 5:964-71.
- 688 65. Tabita FR, Hanson TE, Li H, Satagopan S, Singh J, Chan S. 2007. Function, structure, and evolution  
689 of the RubisCO-like proteins and their RubisCO homologs. *Microbiol Mol Biol Rev* 71:576-99.
- 690 66. Pick TR, Brautigam A, Schulz MA, Obata T, Fernie AR, Weber AP. 2013. PLGG1, a plastidic  
691 glycolate glycerate transporter, is required for photorespiration and defines a unique class of  
692 metabolite transporters. *Proc Natl Acad Sci U S A* 110:3185-90.
- 693 67. Walker BJ, South PF, Ort DR. 2016. Physiological evidence for plasticity in glycolate/glycerate  
694 transport during photorespiration. *Photosynth Res* 129:93-103.
- 695 68. Vogel A, Schwacke R, Denton AK, Usadel B, Hollmann J, Fischer K, Bolger A, Schmidt MH,  
696 Bolger ME, Gundlach H, Mayer KFX, Weiss-Schneeweiss H, Temsch EM, Krause K. 2018.  
697 Footprints of parasitism in the genome of the parasitic flowering plant *Cuscuta campestris*. *Nat*  
698 *Commun* 9:2515.
- 699 69. Vollmer M, Thomsen N, Wiek S, Seeber F. 2001. Apicomplexan parasites possess distinct nuclear-  
700 encoded, but apicoplast-localized, plant-type ferredoxin-NADP<sup>+</sup> reductase and ferredoxin. *J Biol*  
701 *Chem* 276:5483-90.
- 702 70. Schürmann P, Buchanan BB. 2008. The ferredoxin/thioredoxin system of oxygenic photosynthesis.  
703 *Antioxid Redox Signal* 10:1235-74.
- 704 71. Figueroa-Martinez F, Nedelcu AM, Smith DR, Reyes-Prieto A. 2015. When the lights go out: the  
705 evolutionary fate of free-living colorless green algae. *New Phytologist* 206:972-982.

- 706 72. Lohr M, Schwender J, Polle JE. 2012. Isoprenoid biosynthesis in eukaryotic phototrophs: a spotlight  
707 on algae. *Plant Sci* 185-186:9-22.
- 708 73. Waller RF, Gornik SG, Kořený L, Pain A. 2016. Metabolic pathway redundancy within the  
709 apicomplexan-dinoflagellate radiation argues against an ancient chromalveolate plastid. *Commun*  
710 *Integr Biol* 9:e1116653.
- 711 74. Cenci U, Qiu H, Pillonel T, Cardol P, Remacle C, Colleoni C, Kadouche D, Chabi M, Greub G,  
712 Bhattacharya D, Ball SG. 2018. Host-pathogen biotic interactions shaped vitamin K metabolism in  
713 Archaeplastida. *Sci Rep* 8:15243.
- 714 75. Seeger JW, Bentley R. 1991. Phylloquinone (vitamin K<sub>1</sub>) biosynthesis in *Euglena gracilis* strain Z.  
715 *Phytochemistry* 30:3585-3589.
- 716 76. Fatihi A, Latimer S, Schmollinger S, Block A, Dussault PH, Vermaas WF, Merchant SS, Basset GJ.  
717 2015. A dedicated type II NADPH dehydrogenase performs the penultimate step in the biosynthesis  
718 of vitamin K<sub>1</sub> in *Synechocystis* and *Arabidopsis*. *The Plant Cell* 27:1730-41.
- 719 77. Maeda H, DellaPenna D. 2007. Tocopherol functions in photosynthetic organisms. *Curr Opin Plant*  
720 *Biol* 10:260-5.
- 721 78. Brettel K. 1997. Electron transfer and arrangement of the redox cofactors in photosystem I.  
722 *Biochimica et Biophysica Acta (BBA) - Bioenergetics* 1318:322-373.
- 723 79. Furt F, Oostende Cv, Widhalm JR, Dale MA, Wertz J, Basset GJC. 2010. A bimodular  
724 oxidoreductase mediates the specific reduction of phylloquinone (vitamin K<sub>1</sub>) in chloroplasts. *The*  
725 *Plant Journal* 64:38-46.
- 726 80. Karamoko M, Cline S, Redding K, Ruiz N, Hamel PP. 2011. Lumen thiol oxidoreductase1, a  
727 disulfide bond-forming catalyst, is required for the assembly of photosystem II in *Arabidopsis*. *The*  
728 *Plant Cell* 23:4462.
- 729 81. Gu X, Harding S, Nyamdari B, Aulakh K, Clermont K, Westwood J, Tsai C-J. 2018. A role for  
730 phylloquinone biosynthesis in the plasma membrane as revealed in a non-photosynthetic parasitic  
731 plant. *bioRxiv* doi:10.1101/257519:257519.
- 732 82. Lochner K, Doring O, Bottger M. 2003. Phylloquinone, what can we learn from plants? *Biofactors*  
733 18:73-8.
- 734 83. Schopfer P, Heyno E, Drepper F, Krieger-Liszkay A. 2008. Naphthoquinone-dependent generation of  
735 superoxide radicals by quinone reductase isolated from the plasma membrane of soybean. *Plant*  
736 *Physiol* 147:864.
- 737 84. Goddard-Borger ED, Williams SJ. 2017. Sulfoquinovose in the biosphere: occurrence, metabolism  
738 and functions. *Biochem J* 474:827-849.
- 739 85. Yoon EY, Yang AR, Park J, Moon SJ, Jeong EJ, Rho JR. 2017. Characterization of a new trioxilin

- 740 and a sulfoquinovosyl diacylglycerol with anti-inflammatory properties from the dinoflagellate  
741 *Oxyrrhis marina*. Mar Drugs 15:57.
- 742 86. Botté C, Saidani N, Mondragon R, Mondragon M, Isaac G, Mui E, McLeod R, Dubremetz JF, Vial  
743 H, Welti R, Cesbron-Delauw MF, Mercier C, Maréchal E. 2008. Subcellular localization and  
744 dynamics of a digalactolipid-like epitope in *Toxoplasma gondii*. J Lipid Res 49:746-62.
- 745 87. Botté CY, Yamaryo-Botté Y, Rupasinghe TW, Mullin KA, MacRae JI, Spurck TP, Kalanon M,  
746 Shears MJ, Coppel RL, Crellin PK, Maréchal E, McConville MJ, McFadden GI. 2013. Atypical lipid  
747 composition in the purified relict plastid (apicoplast) of malaria parasites. Proc Natl Acad Sci U S A  
748 110:7506-11.
- 749 88. Donaher N, Tanifuji G, Onodera NT, Malfatti SA, Chain PS, Hara Y, Archibald JM. 2009. The  
750 complete plastid genome sequence of the secondarily nonphotosynthetic alga *Cryptomonas*  
751 *paramecium*: reduction, compaction, and accelerated evolutionary rate. Genome Biol Evol 1:439-48.
- 752 89. Sekiguchi H, Moriya M, Nakayama T, Inouye I. 2002. Vestigial chloroplasts in heterotrophic  
753 stramenopiles *Pteridomonas danica* and *Ciliophrys infusionum* (Dictyochophyceae). Protist 153:157-  
754 67.
- 755 90. Wicke S, Müller KF, de Pamphilis CW, Quandt D, Wickett NJ, Zhang Y, Renner SS, Schneeweiss  
756 GM. 2013. Mechanisms of functional and physical genome reduction in photosynthetic and  
757 nonphotosynthetic parasitic plants of the broomrape family. The Plant Cell 25:3711.
- 758 91. Kim GH, Jeong HJ, Yoo YD, Kim S, Han JH, Han JW, Zuccarello GC. 2013. Still acting green:  
759 continued expression of photosynthetic genes in the heterotrophic Dinoflagellate *Pfiesteria piscicida*  
760 (Peridinales, Alveolata). PLoS One 8:e68232.
- 761 92. Schwender J, Goffman F, Ohlrogge JB, Shachar-Hill Y. 2004. Rubisco without the Calvin cycle  
762 improves the carbon efficiency of developing green seeds. Nature 432:779-82.
- 763 93. Iddar A, Valverde F, Serrano A, Soukri A. 2003. Purification of recombinant non-phosphorylating  
764 NADP-dependent glyceraldehyde-3-phosphate dehydrogenase from *Streptococcus pyogenes*  
765 expressed in *E. coli*. Mol Cell Biochem 247:195-203.
- 766 94. Rius SP, Casati P, Iglesias AA, Gomez-Casati DF. 2006. Characterization of an *Arabidopsis thaliana*  
767 mutant lacking a cytosolic non-phosphorylating glyceraldehyde-3-phosphate dehydrogenase. Plant  
768 Mol Biol 61:945-57.
- 769 95. Tucci S, Vacula R, Krajčovič J, Proksch P, Martin W. 2010. Variability of wax ester fermentation in  
770 natural and bleached *Euglena gracilis* strains in response to oxygen and the elongase inhibitor  
771 flufenacet. J Eukaryot Microbiol 57:63-9.
- 772 96. Yoshida Y, Tomiyama T, Maruta T, Tomita M, Ishikawa T, Arakawa K. 2016. De novo assembly  
773 and comparative transcriptome analysis of *Euglena gracilis* in response to anaerobic conditions.

- 774 BMC Genomics 17:182.
- 775 97. Roger AJ, Muñoz-Gómez SA, Kamikawa R. 2017. The origin and diversification of mitochondria.  
776 Curr Biol 27:R1177-R1192.
- 777 98. Jones P, Binns D, Chang HY, Fraser M, Li W, McAnulla C, McWilliam H, Maslen J, Mitchell A,  
778 Nuka G, Pesseat S, Quinn AF, Sangrador-Vegas A, Scheremetjew M, Yong SY, Lopez R, Hunter S.  
779 2014. InterProScan 5: genome-scale protein function classification. Bioinformatics 30:1236-40.
- 780 99. Mistry J, Finn RD, Eddy SR, Bateman A, Punta M. 2013. Challenges in homology search: HMMER3  
781 and convergent evolution of coiled-coil regions. Nucleic Acids Res 41:e121.
- 782 100. Ebenezer TE, Carrington M, Lebert M, Kelly S, Field MC. 2017. *Euglena gracilis* genome and  
783 transcriptome: Organelles, nuclear genome assembly strategies and initial features. Adv Exp Med  
784 Biol 979:125-140.
- 785 101. Keeling PJ, Burki F, Wilcox HM, Allam B, Allen EE, Amaral-Zettler LA, Armbrust EV, Archibald  
786 JM, Bharti AK, Bell CJ, Beszteri B, Bidle KD, Cameron CT, Campbell L, Caron DA, Cattolico RA,  
787 Collier JL, Coyne K, Davy SK, Deschamps P, Dyhrman ST, Edvardsen B, Gates RD, Gobler CJ,  
788 Greenwood SJ, Guida SM, Jacobi JL, Jakobsen KS, James ER, Jenkins B, John U, Johnson MD, Juhl  
789 AR, Kamp A, Katz LA, Kiene R, Kudryavtsev A, Leander BS, Lin S, Lovejoy C, Lynn D, Marchetti  
790 A, McManus G, Nedelcu AM, Menden-Deuer S, Miceli C, Mock T, Montresor M, Moran MA,  
791 Murray S, et al. 2014. The Marine Microbial Eukaryote Transcriptome Sequencing Project  
792 (MMETSP): illuminating the functional diversity of eukaryotic life in the oceans through  
793 transcriptome sequencing. PLoS Biol 12:e1001889.
- 794 102. Katoh K, Standley DM. 2013. MAFFT multiple sequence alignment software version 7:  
795 improvements in performance and usability. Mol Biol Evol 30:772-80.
- 796 103. Capella-Gutierrez S, Silla-Martinez JM, Gabaldon T. 2009. trimAl: a tool for automated alignment  
797 trimming in large-scale phylogenetic analyses. Bioinformatics 25:1972-3.
- 798 104. Goodstadt L, Ponting CP. 2001. CHROMA: consensus-based colouring of multiple alignments for  
799 publication. Bioinformatics 17:845-6.
- 800 105. Nguyen LT, Schmidt HA, von Haeseler A, Minh BQ. 2015. IQ-TREE: a fast and effective stochastic  
801 algorithm for estimating maximum-likelihood phylogenies. Mol Biol Evol 32:268-74.
- 802 106. Cramer M, Myers J. 1952. Growth and photosynthetic characteristics of *Euglena gracilis*. Archiv  
803 Mikrobiol 17:384-402.
- 804 107. Sonneborn TM. 1950. Methods in the general biology and genetics of *Paramecium aurelia*. Journal  
805 of Experimental Zoology 113:87-147.
- 806 108. Tomčala A, Kyselová V, Schneedorferová I, Opekarová I, Moos M, Urajová P, Kručinská J, Oborník  
807 M. 2017. Separation and identification of lipids in the photosynthetic cousins of Apicomplexa



808 *Chromera velia* and *Vitrella brassicaformis*. J Sep Sci 40:3402-3413.  
809 109. Folch J, Lees M, Sloane Stanley GH. 1957. A simple method for the isolation and purification of total  
810 lipides from animal tissues. J Biol Chem 226:497-509.  
811 110. Botté CY, Yamaryo-Botté Y, Janouškovec J, Rupasinghe T, Keeling PJ, Crellin P, Coppel RL,  
812 Maréchal E, McConville MJ, McFadden GI. 2011. Identification of plant-like galactolipids in  
813 *Chromera velia*, a photosynthetic relative of malaria parasites. J Biol Chem 286:29893-903.

## 814 815 **FIGURE LEGENDS**

816 **Figure 1: IPP and terpenoid-quinone biosynthesis in *E. longa* and its phototrophic relative *E.***  
817 ***gracilis*. a:** Schematic comparison of the localization and evolutionary origin of enzymes (see colour-  
818 coding graphical legend below the “cells”). Abbreviations, IPP synthesis: ACAT – acetyl-CoA  
819 acetyltransferase, CDP-ME – 4-(cytidine 5'-diphospho)-2-C-methyl-D-erythritol, CDP-MEP – 2-phospho-  
820 CDP-ME, CMK – CDP-ME kinase, CMS – CDP-ME synthase, DMAPP – dimethylallyl diphosphate,  
821 DXP – 1-deoxy-D-xylulose 5-phosphate, DXR – DXP reductase, DXS – DXP synthase, FPP – farnesyl  
822 siphosphate synthase, GGPS – geranylgeranyl-diphosphate synthase, HDR – HMB-PP reductase, HDS –  
823 HMB-PP synthase, HMB-PP – 4-hydroxy-3-methylbut-2-en-1-yl diphosphate, HMG-CoA – 3-hydroxy-3-  
824 methylglutaryl-CoA, HMGCR – HMG-CoA reductase, HMGCS – HMG-CoA synthase, IDI –  
825 isopentenyl-diphosphate delta-isomerase, MCS – MEcPP synthase, MDD – mevalonate-diphosphate  
826 decarboxylase, MEcPP – 2-C-methyl-D-erythritol 2,4-cyclodiphosphate, MEP – 2-C-methyl-D-erythritol  
827 4-phosphate, MVK – mevalonate kinase, PMVK – phosphomevalonate kinase, PPS – unspecified  
828 polyprenyl-diphosphate synthase, ? – unclear substrate; Terpenoid-quinone synthesis: 4HPP – 4-  
829 hydroxyphenylpyruvate, HPD – hydroxyphenylpyruvate dioxygenase, HPT – homogentisate  
830 phytyltransferase, MMT – MPBQ/MPSQ methyltransferase, TAT – tyrosine aminotransferase, TC –  
831 tocopherol cyclase, TMT – tocopherol-O-methyltransferase, VTE5 – phytyl kinase, VTE6 – phytyl-  
832 phosphate kinase. **b:** MS/MS spectrum record of *E. longa*  $\alpha$ -tocopherol and the proposed fragmentation  
833 pattern in positive ionization mode (inset). Monoisotopic masses of particular fragments were obtained by  
834 simulation in Xcalibur software. **c:** Semiquantitative comparison of tocopherol species in *E. longa*,  
835 heterotrophically (dark) grown *E. gracilis* and autotrophically grown *E. gracilis*. **d-e:** MS/MS spectrum  
836 record of *E. longa* 5-hydroxyphyloquinone and the proposed fragmentation pattern in positive ionization  
837 mode (inset); semiquantitative comparison of 5-hydroxyphyloquinone in *E. longa*, heterotrophically  
838 (dark) grown *E. gracilis* and autotrophically grown *E. gracilis*.

839  
840 **Figure 2: Fatty acid and lipid biosynthesis in *E. longa* and *E. gracilis*. a:** Schematic comparison of the  
841 localization and evolutionary origin of enzymes. Abbreviations, fatty acid synthesis: ACC – acetyl-CoA

842 carboxylase, ACS – acetyl-CoA synthetase, ENR – enoyl-CoA reductase, Fas1 – malonyl-CoA/acetyl-  
843 CoA: ACP transacylase, FASI – type I fatty acid synthase, FAT – fatty acyl-ACP thioesterase, HD –  
844 hydroxyacyl-ACP dehydratase, KAR – ketoacyl-ACP reductase, KAS – ketoacyl-ACP synthase, TE –  
845 fatty acid thioesterase, TRX – thioredoxin-regulated enzyme; glycolipid synthesis: AAS – acyl-ACP  
846 synthase, ACPS – holo-ACP synthase, AGP-AT – acylglycerophosphate acyltransferase, G3P-AT –  
847 glycerol-3-phosphate acyltransferase, G3PDH – glycerol-3-phosphate dehydrogenase, MGDG/DGDG –  
848 mono-/digalactosyl diacylglycerol, MGDGS/DGDGS – MGDG/DGDG synthase, PAP – phosphatidic  
849 acid phosphatase, SQD1 – UDP-sulfoquinovose synthase, SQD2/SQDX – sulfoquinovosyl diacylglycerol  
850 (SQDG) synthase, UGE/PHD1 – UDP-glucose epimerase, USPP – UDP-sugar pyrophosphorylase;  
851 phospholipid synthesis: CDS – CDP-diacylglycerol synthase, PGP1 – phosphatidylglycerophosphate  
852 synthase, PGP-P – phosphateidylglycerophosphate phosphatase. **b:** Semiquantitative comparison of  
853 glycolipids present in *E. longa* and autotrophically grown *E. gracilis*. Note the logarithmic scale of the  
854 quantification units (peak area). Peak area is an arbitrary unit expressing the intensity of the signal of a  
855 particular lipid species, recalculated according to their respective ionization promptitude. As each lipid  
856 species have different ionization promptitude, note that direct comparison can be done only within lipid  
857 class (for details, see Tomčala et al. 2017). **c-e:** Immunofluorescence micrographs using anti-DGDG  
858 antibody (C), DAPI (D) and differential interference contrast (E). Autotrophic *E. gracilis* represents a  
859 positive control, while the aplastidic euglenozoan *R. costata* was used as negative control.

860  
861 **Figure 3: Euglenophytes have replaced the eukaryotic form of sulfoquinovosyltransferase (SQD2)**  
862 **with a bacterial version (SqdX).** The maximum-likelihood tree was inferred with IQ-TREE using the  
863 LG+F+G4 substitution model and ultra-fast bootstrapping. The UFboot support values are indicated at  
864 branches when higher than 75%. Accession numbers of sequences included in the analysis are provided in  
865 Table S11.

866  
867 **Figure 4: Carbon metabolism in the plastids of *E. longa* and *E. gracilis*.** **a:** The Calvin-Benson cycle  
868 (CBC) resident to this organelle is central to the plastid carbon metabolism, regulated by the  
869 ferredoxin/thioredoxin (Fd/Trx) system. Reduction of disulfide bonds by the Fd/Trx system activates FBP  
870 and PRK. FTR and FD of the Fd/Trx system require for their function a post-translationally added Fe-S  
871 prosthetic group provided by the Fe-S assembly system. GapN apparently mediates shuttling of reducing  
872 equivalent (NADPH) through the exchange of DHAP/GA3P and 3PG, reflecting the cytosolic  
873 NADPH/NADP<sup>+</sup> ratio and thus an overall metabolic state of the cell. In contrast, *E. gracilis* plastid is an  
874 energy-converting organelle, harvesting light into chemical energy bound as NADPH and ATP and  
875 subsequently using this bound energy to fix CO<sub>2</sub> into organic carbohydrates via the CBC. Enzyme

876 abbreviations are colour-coded according to their inferred evolutionary origin, see the graphical legend. **b:**  
877 Stoichiometric comparison of reactions converting glyceraldehyde 3-phosphate to 3-phosphoglycerate via  
878 glycolysis and the Calvin-Benson pathway. Abbreviations: 3PG – 3-phosphoglycerate, ALDO – aldolase,  
879 DHAP – dihydroxyacetone-phosphate, FBP – fructose-1,6-bisphosphatase, GA3P – glyceraldehyde-3-  
880 phosphate, GAPDH – glyceraldehyde-3-phosphate dehydrogenase, PGK – 3-phosphoglycerate kinase,  
881 PGP – phosphoglycolate phosphatase, PLGG1 – plastid glycolate/glycerate transporter, PRK –  
882 phosphoribulokinase, RBCL/RBCS – RuBisCO large/small subunit, RCA – RuBisCO activase, RPE –  
883 ribulose-5-phosphate epimerase; RPIA – ribulose-phosphate isomerase A, SBP – sedoheptulose-1,7-  
884 bisphosphatase, TKTL – transketolase, TPI – triose-phosphate isomerase, TPT – triose-phosphate  
885 translocator; Fd/Trx system: FD – ferredoxin; FNR – FD/NADP<sup>+</sup> oxidoreductase, FTR – FD/TRX  
886 oxidoreductase, TRX – thioredoxin, ATPS – ATP synthase, ATPC – ADP/ATP translocase, LHC – light-  
887 harvesting complex.

888  
889 **Figure 5: The inferred phylogeny of FNR.** The maximum-likelihood tree was inferred with IQ-TREE  
890 using the LG+F+G4 substitution model and ultra-fast bootstrapping. The UFboot support values are  
891 indicated at branches when higher than 75%. Euglenophyte species are in bold, and their putative  
892 photosynthetic and non-photosynthetic homologs are depicted. The two forms of plant FNR are indicated:  
893 P, photosynthetic; NP, non-photosynthetic. Accession numbers of sequences included in the analysis are  
894 provided in Table S12.

**a** *Euglena longa*

*Euglena gracilis*

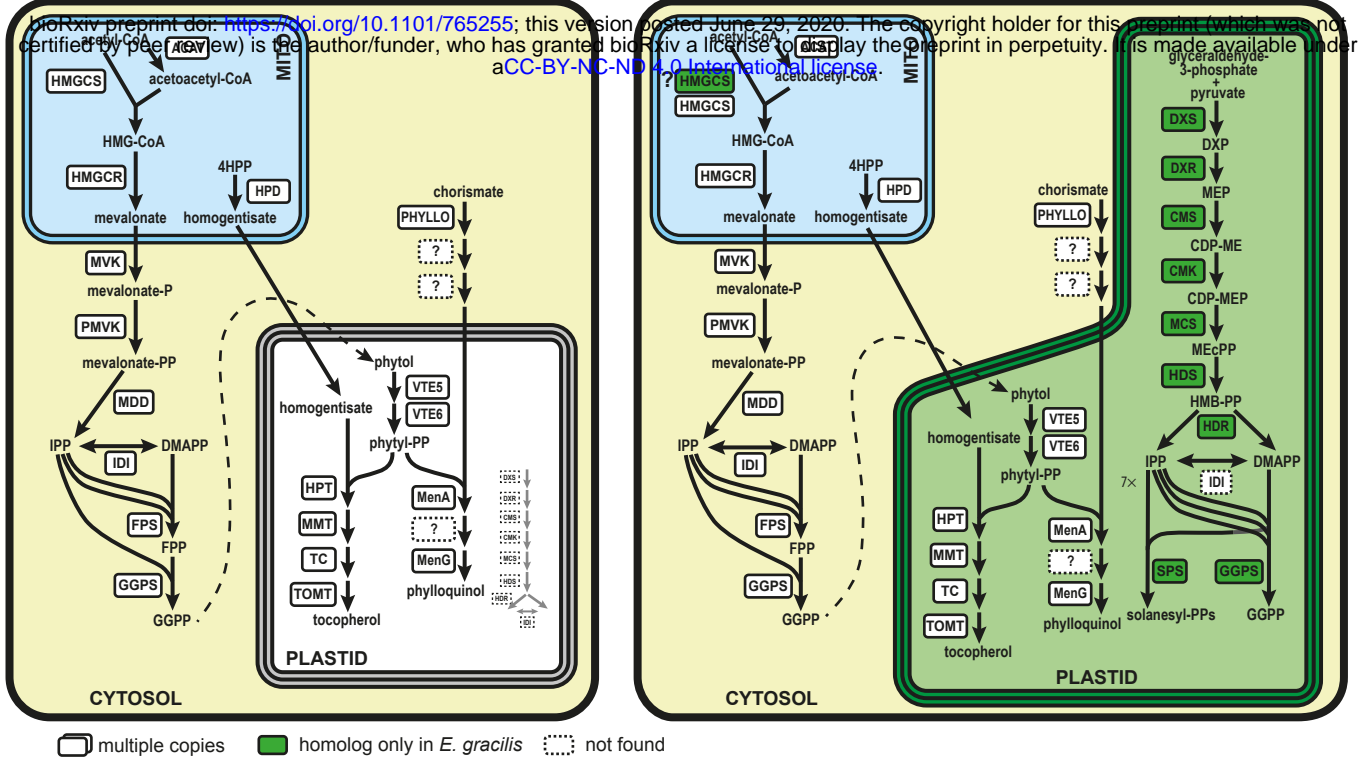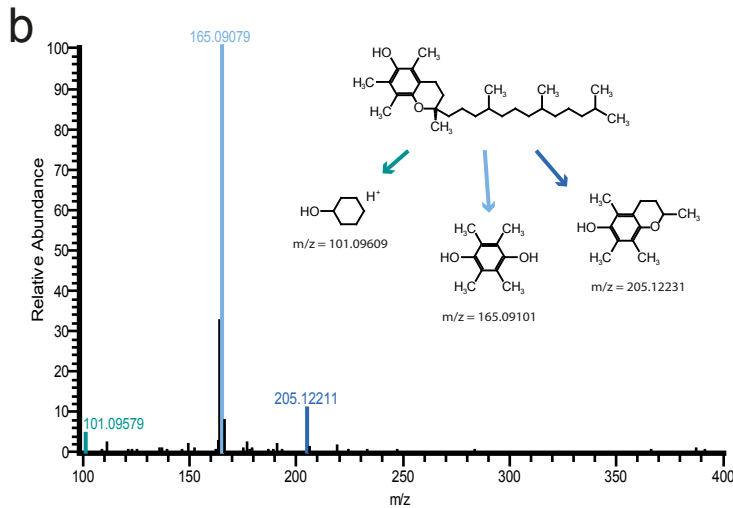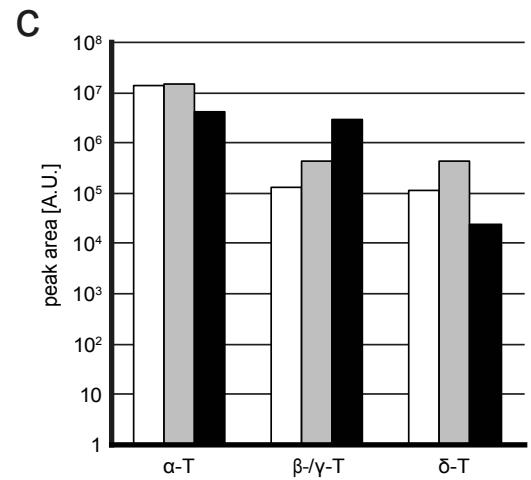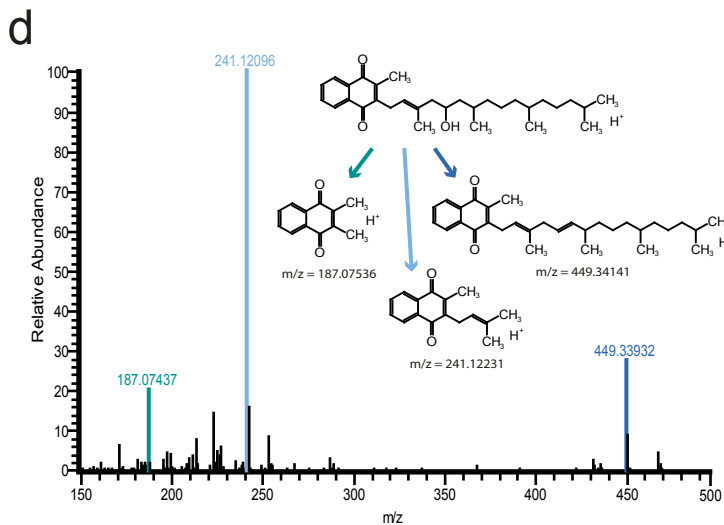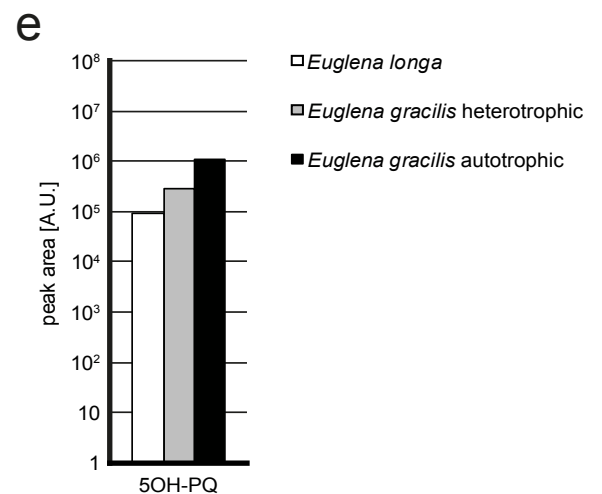

**a** *Euglena longa*

bioRxiv preprint doi: <https://doi.org/10.1101/765255>; this version posted June 29, 2020. The copyright holder for this preprint (which was not certified by peer review) is the author/funder, who has granted bioRxiv a license to display the preprint in perpetuity. It is made available under aCC-BY-NC-ND 4.0 International license.

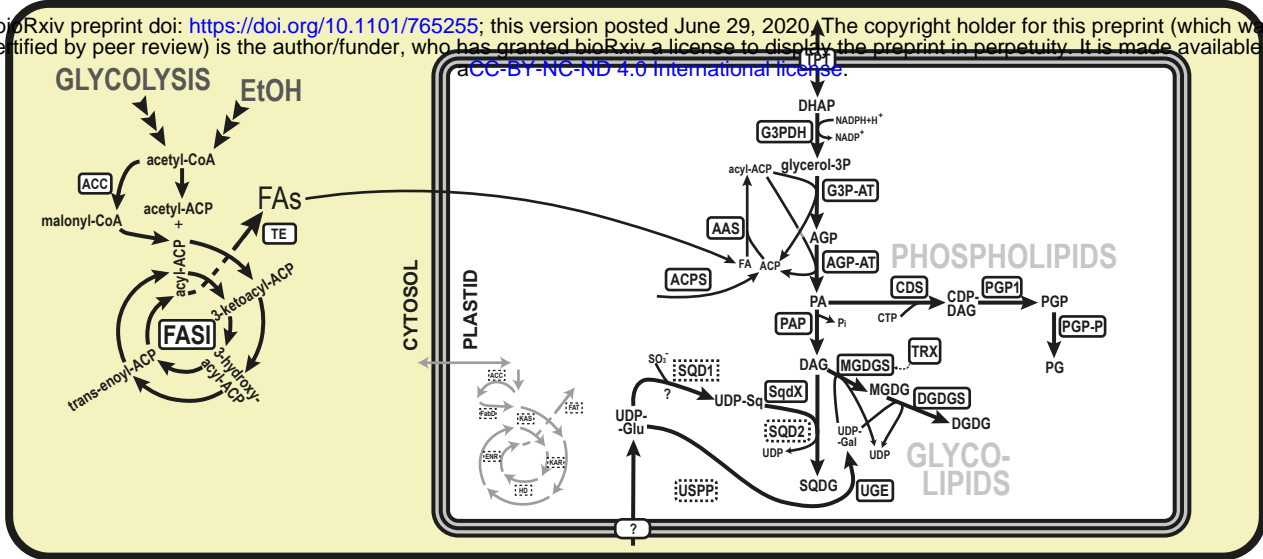

*Euglena gracilis*

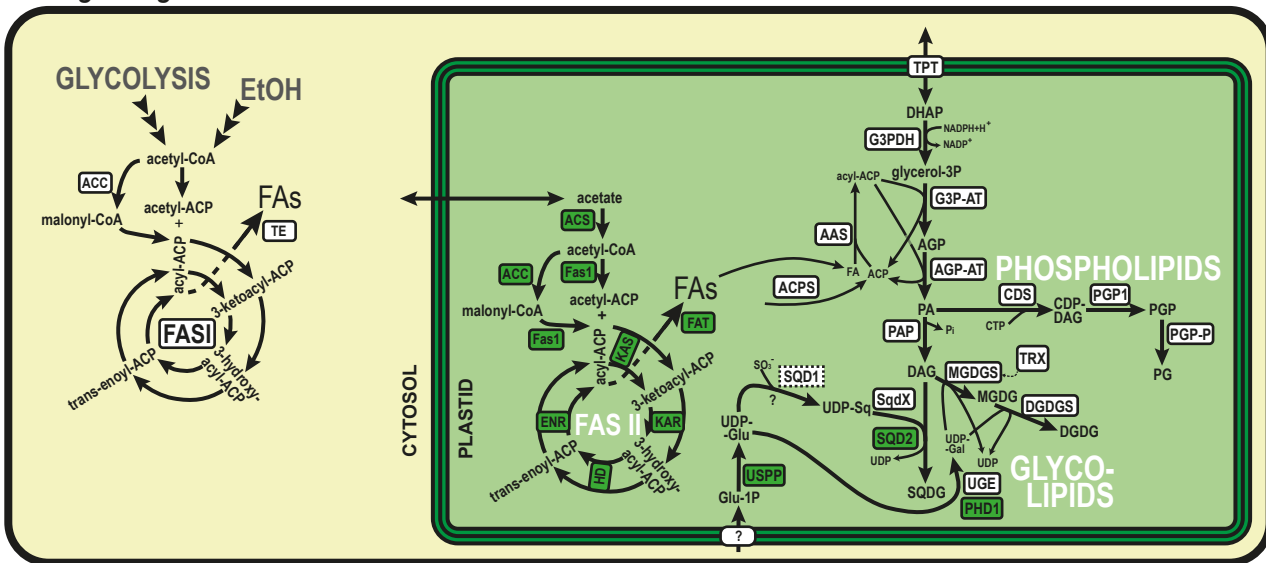

■ homolog only in *E. gracilis*  
 □ not found

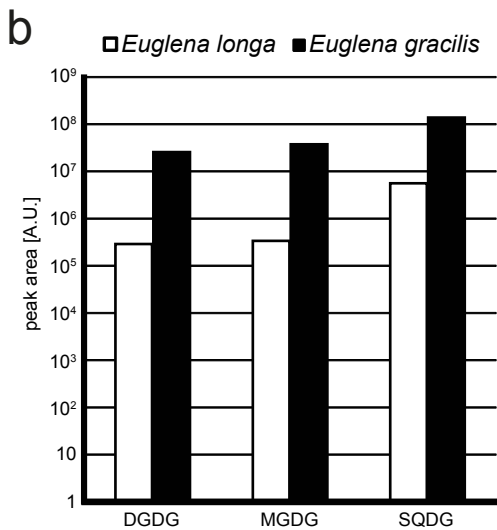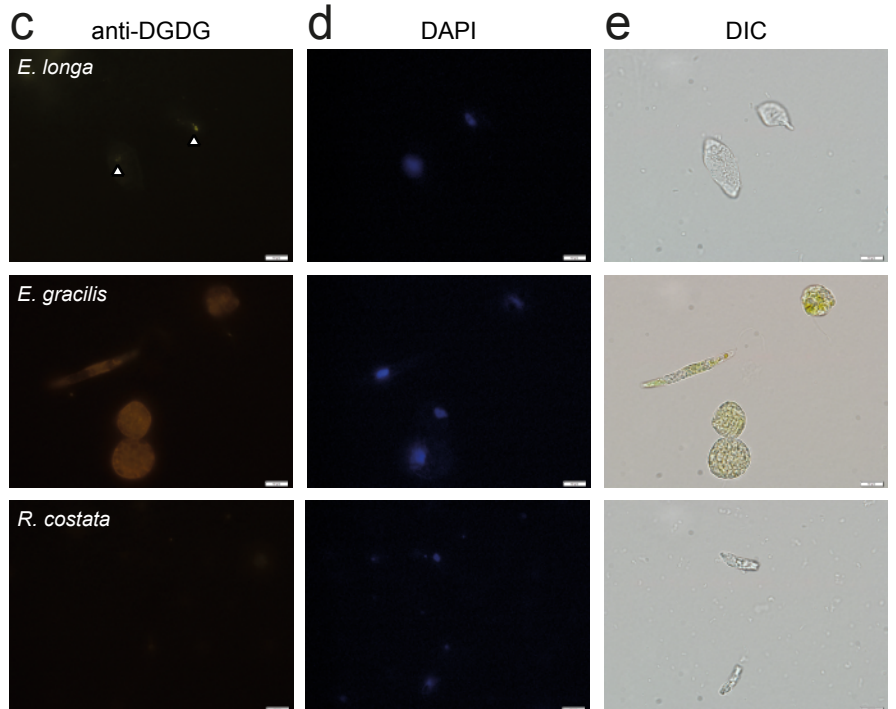

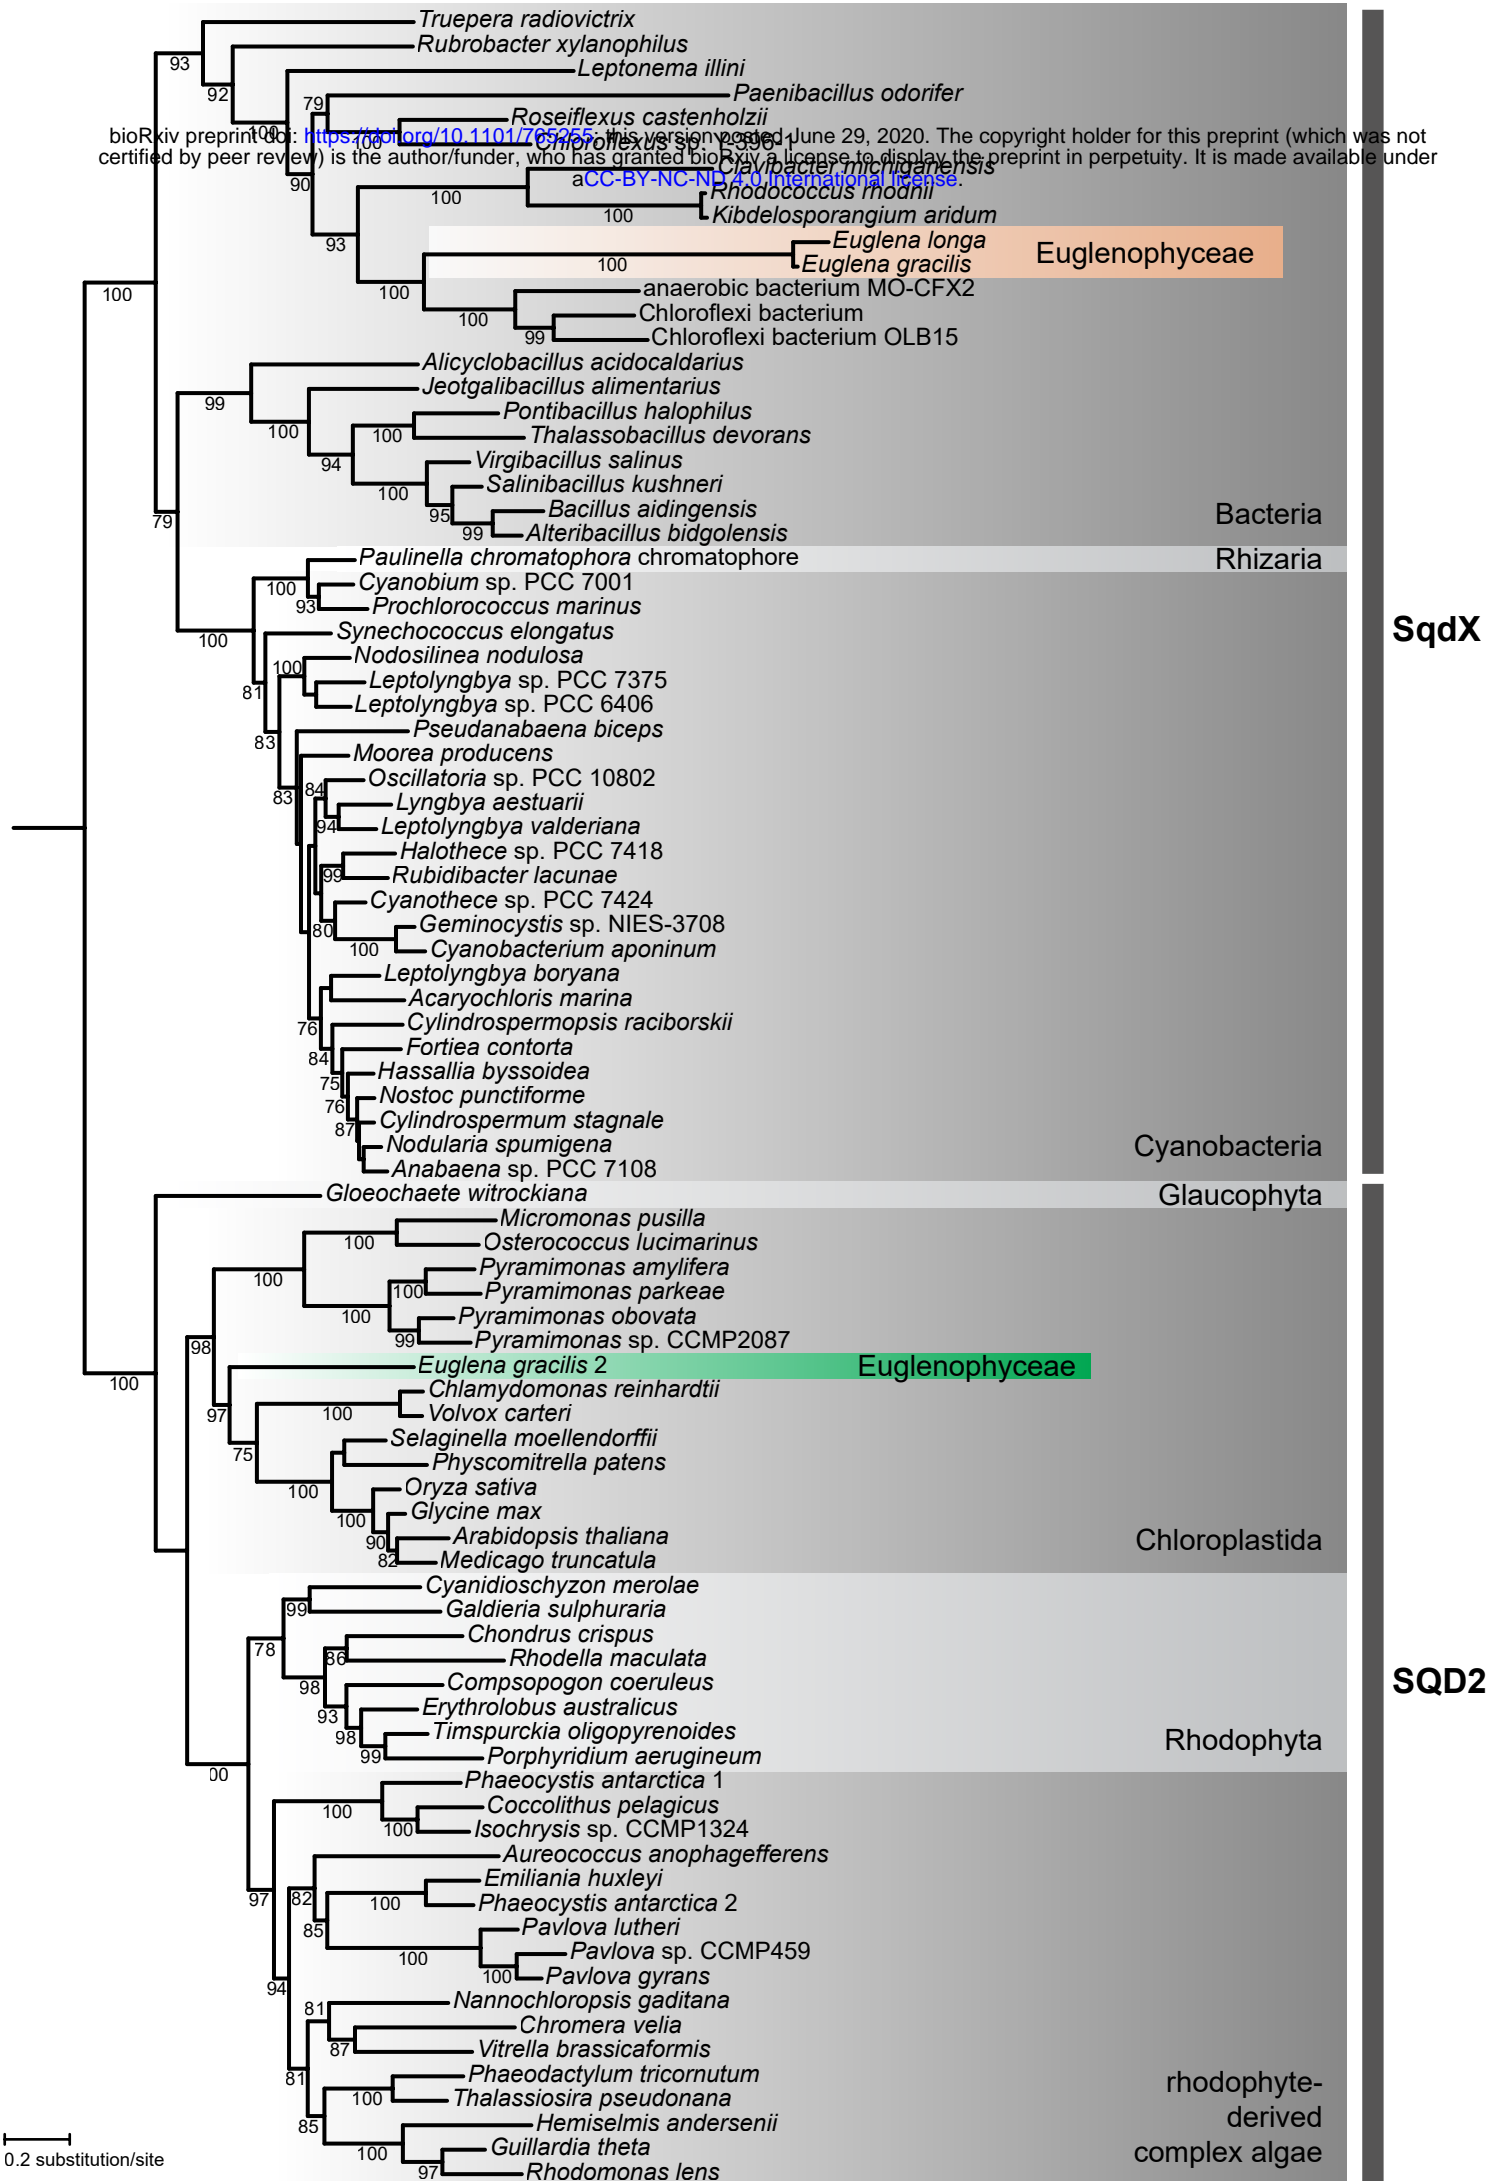

a *Euglena longa*

*Euglena gracilis*

bioRxiv preprint doi: <https://doi.org/10.1101/052555>; this version posted June 29, 2020. The copyright holder for this preprint (which was not certified by peer review) is the author/funder, who has granted bioRxiv a license to display the preprint in perpetuity. It is made available under aCC-BY-NC-ND 4.0 International license.

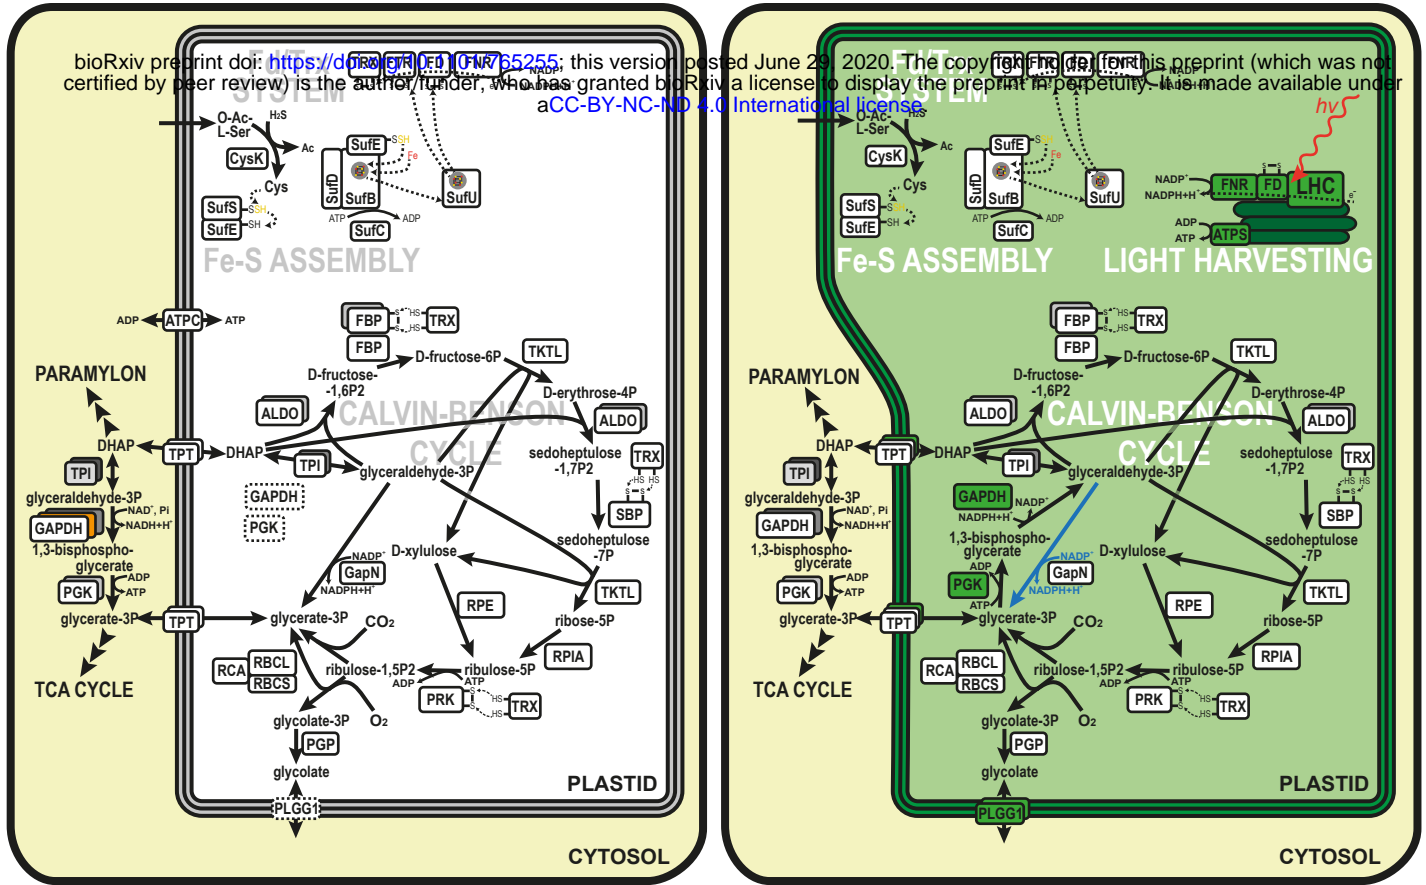

multiple copies   
 homolog only in *E. gracilis*   
 orthologs with different localisation   
 not found   
→ dark reaction  
 homolog only in *E. longa*   
 orthologs with the same localisation

b

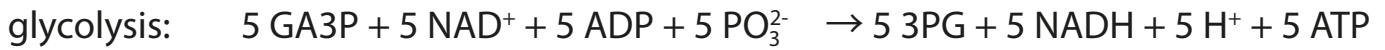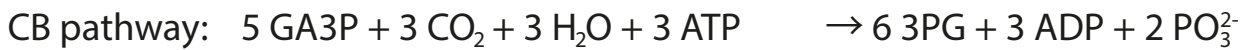

83 — *Cyanophora paradoxa* Glaucophyta  
 94 — *Galdieria sulphuraria* Rhodophyta  
 100 — *Chondrus crispus*  
 100 — *Pyropia verzoensis*  
 100 — *Cyanidioschyzon merolae*  
 100 — *Cyanidium caldarium*  
 86 — *Arabidopsis thaliana* P1 Chloroplastida  
 100 — *Mesembryanthemum* P  
 100 — *Spinacia oleracea* P  
 100 — *Pisum sativum* P  
 100 — *Vicia faba* P  
 98 — *Nicotiana tabacum* P  
 98 — *Capsicum annum* P  
 85 — *Arabidopsis thaliana* P2  
 85 — *Oryza sativa* P  
 — *Zea mays* P1  
 — *Zea mays* P2  
 100 — *Arabidopsis thaliana* NP1  
 — *Arabidopsis thaliana* NP2  
 100 — *Oryza sativa* NP  
 98 — *Zea mays* NP  
 — *Oryza sativa* NP  
 — *Pisum sativum* NP  
 — *Nicotiana tabacum* NP  
 98 — *Volvox carteri*  
 100 — *Chlamydomonas reinhardtii*  
 100 — *Eutreptiella gymnastica* NIES-381 2 putative photosynthetic homologs  
 100 — *Euglena gracilis* 2  
 100 — *Eutreptiella gymnastica*-like CCMP1594 2  
 93 — *Eutreptiella gymnastica*-like CCMP1594 1 putative non-photosynthetic homologs  
 80 — *Eutreptiella gymnastica* NIES-381 1  
 89 — *Euglena longa*  
 100 — *Euglena gracilis* 1  
 — *Toxoplasma gondii* Apicomplexa  
 88 — *Eimeria tenella*  
 95 — *Plasmodium falciparum*  
 100 — *Theileria parva*  
 100 — *Synechococcus* sp. Cyanobacteria  
 — *Nostoc* sp. PCC 7119  
 — *Synechocystis* sp. PCC 6803

bioRxiv preprint doi: <https://doi.org/10.1101/176525>; this version posted June 29, 2020. The copyright holder for this preprint (which was not certified by peer review) is the author/funder, who has granted bioRxiv a license to display the preprint in perpetuity. It is made available under aCC-BY-NC-ND 4.0 International license.

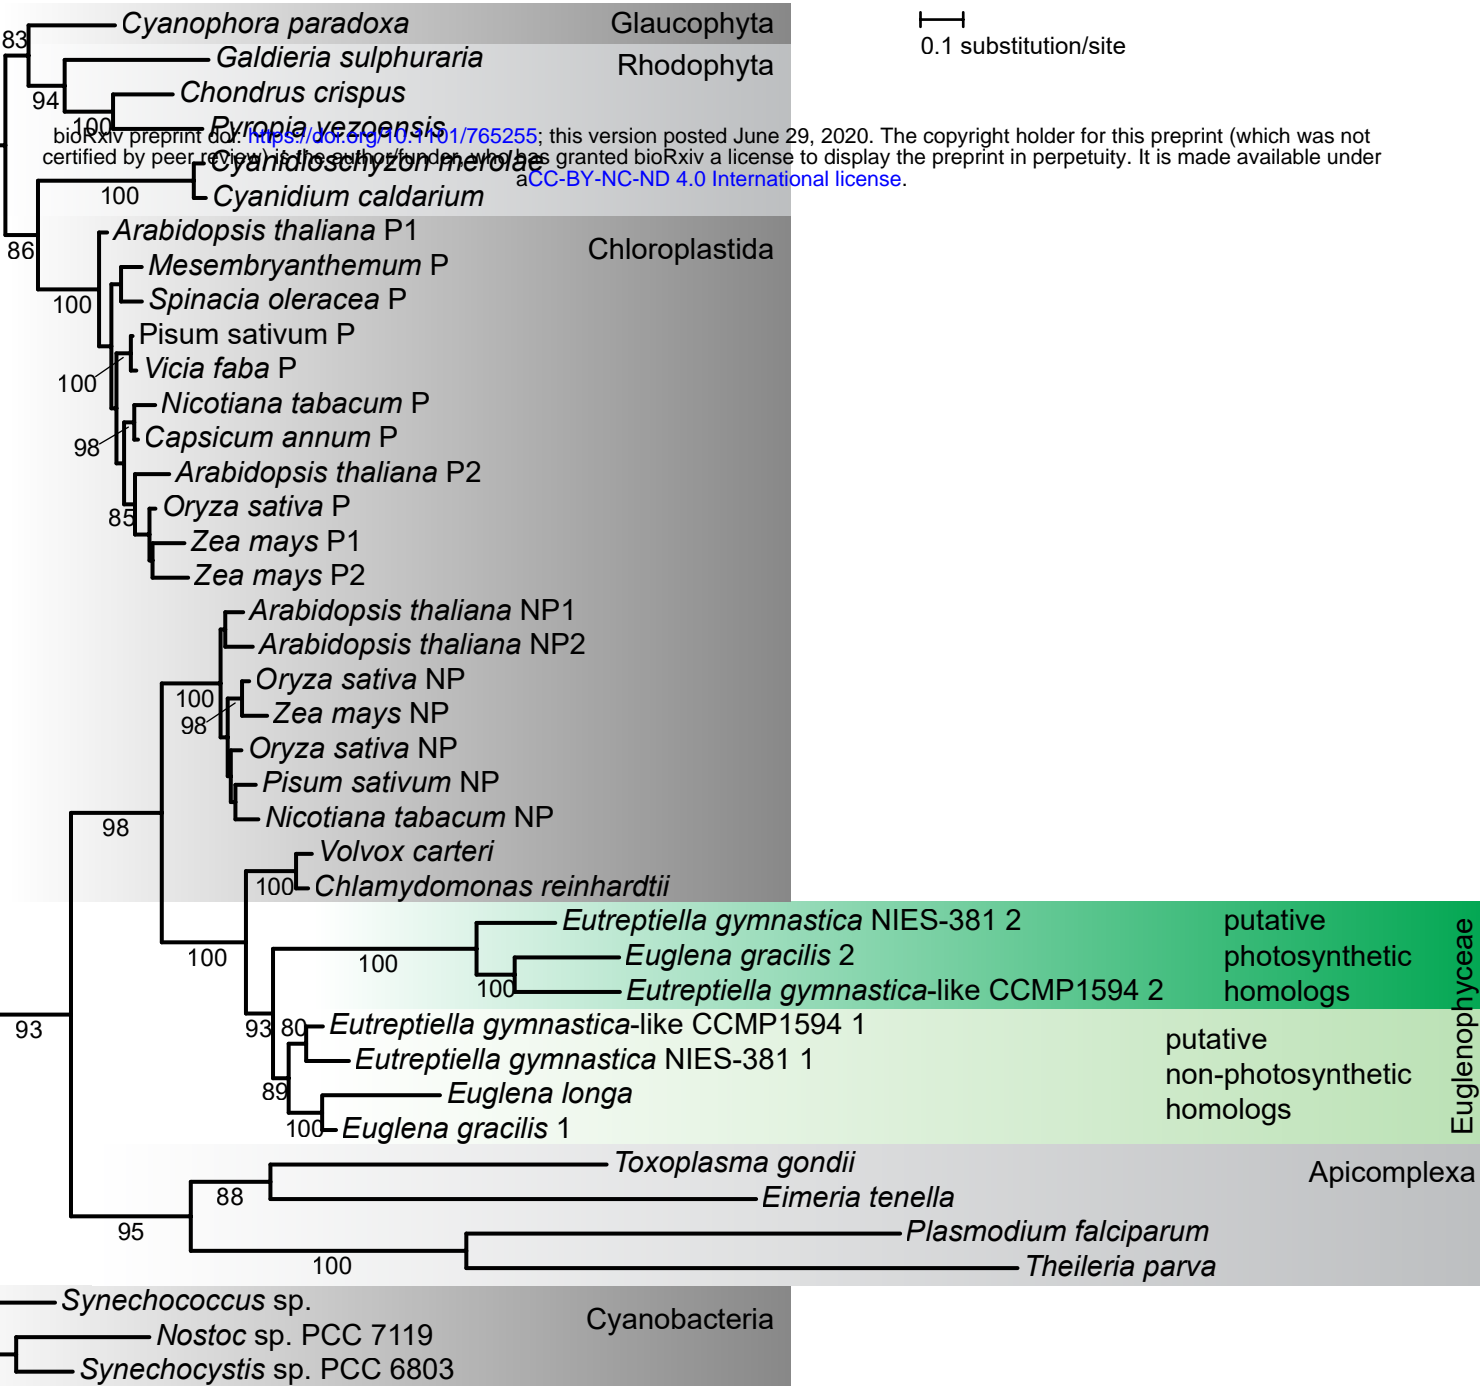

Source: https://www.biorxiv.org/content/biorxiv/early/2020/06/29/765255.full.pdf
